1 **p38-mitogen activated kinases mediate a developmental regulatory**  
2 **response to amino acid depletion and associated oxidative stress in mouse**  
3 **blastocyst embryos**

4  
5 Pablo Bora<sup>1</sup>, Vasanth Thamodaran<sup>1,2</sup>, Andrej Šušor<sup>3</sup> and Alexander W. Bruce<sup>1†</sup>

6  
7 <sup>1</sup>Laboratory of Early Mammalian Developmental Biology (LEMDB)

8 Department of Molecular Biology & Genetics,

9 Faculty of Science, University of South Bohemia,

10 Branišovská 31,

11 37005 České Budějovice (Budweis),

12 CZECH REPUBLIC.

13

14 <sup>2</sup> - *current address*; Centre for Stem Cell Research (a unit of ‘inStem’, Bengaluru),

15 Christian Medical College Campus,

16 Bagayam,

17 Vellore-632002,

18 INDIA

19

20 <sup>3</sup>Laboratory of Biochemistry and Molecular Biology of Germ Cells

21 Institute of Animal Physiology and Genetics CAS, v. v. i.,

22 Rumburská 89,

23 27721 Liběchov,

24 CZECH REPUBLIC

25

26

27 †correspondence; awbruce@prf.jcu.cz (A.W.B.), ORCID: AWB - [000-0003-4297-4412](https://orcid.org/000-0003-4297-4412)

28 Tel: +420387772291

29 Fax: +42038777226 (not confidential)

30

31 **Key words:** p38-Mitogen activated kinases, mouse blastocyst, cell fate, oxidative stress, primitive endoderm,  
32 developmental origin of health and disease (DOHaD).

33

34 **Abbreviations:** p38-MAPK; p38-mitogen activated kinases (specifically p38 $\alpha$ & $\beta$ / MAPK14/11), TE;

35 trophoctoderm, PrE; primitive endoderm, EPI; epiblast, ICM; inner cell mass, ERK1/2; extra-cellular regulated

36 kinases 1/2, DOHaD; developmental origin of health and disease, AA; amino acid, NAC; N-acetyl-cysteine, ROS;

37 reactive oxygen species, KSOM; potassium simplex optimisation media.

38 **Abstract**

39

40 Maternal starvation coincident with preimplantation development has profound consequences for placental-  
41 foetal development, with various identified pathologies persisting/manifest in adulthood; the  
42 'Developmental Origin of Health and Disease' (DOHaD) hypothesis/model. Despite evidence describing  
43 DOHaD-related incidence, supporting mechanistic and molecular data relating to preimplantation embryos  
44 themselves are comparatively meagre. We recently identified the classically recognised stress-related p38-  
45 mitogen activated kinases (p38-MAPK) as regulating formation of the extraembryonic primitive endoderm  
46 (PrE) lineage within mouse blastocyst inner cell mass (ICM). Thus, we wanted to assay if PrE differentiation  
47 is sensitive to amino acid availability, in a manner regulated by p38-MAPK. Although blastocysts  
48 appropriately mature, without developmental/morphological or cell fate defects, irrespective of amino acid  
49 supplementation status, we found the extent of p38-MAPK inhibition induced phenotypes was more severe  
50 in the absence of amino acid supplementation. Specifically, both PrE and epiblast (EPI) ICM progenitor  
51 populations remained unspecified and there were fewer cells and smaller blastocyst cavities. Such  
52 phenotypes could be ameliorated, to resemble those observed in groups supplemented with amino acids, by  
53 addition of the anti-oxidant NAC (N-acetyl-cysteine), although PrE differentiation deficits remained.  
54 Therefore, p38-MAPK performs a hitherto unrecognised homeostatic early developmental regulatory role  
55 (in addition to direct specification of PrE), by buffering blastocyst cell number and ICM cell lineage  
56 specification (relating to EPI) in response to amino acid availability, partly by counteracting induced  
57 oxidative stress; with clear implications for the DOHaD model.

## 58 Introduction

59

60 The formation of the peri-implantation stage mouse blastocyst (by embryonic day 4.5/E4.5) represents the  
61 culmination of the preimplantation period in which three distinct cell lineages emerge. Two lineages are  
62 differentiating and will ultimately yield supportive extraembryonic tissues; the outer-residing and epithelised  
63 trophoctoderm (TE) that gives rise to the placenta, and the mono-layered primitive endoderm (PrE),  
64 occupying the interface between the fluid filled cavity and underlying inner cell mass (ICM), that contributes  
65 to the yolk sac. The third lineage, represented by the pluripotent epiblast (EPI), residing deep within the  
66 ICM, serves as a progenitor pool for all subsequent tissues of the foetus; extensively reviewed (Frum and  
67 Ralston, 2015;Chazaud and Yamanaka, 2016;Rossant, 2016)). We have previously reported a role for p38-  
68 mitogen activated kinases  $\alpha/\beta$  (herein referred to as p38-MAPK), employing pharmacological inhibition, in  
69 regulating primitive endoderm (PrE) differentiation within mouse blastocyst inner cell mass  
70 (ICM)(Thamodaran and Bruce, 2016). p38-MAPK was found to act during the early stages of ICM maturation  
71 (the period between E3.5-E4.5), downstream of fibroblast growth factor (FGF) signalling, permitting PrE  
72 progenitors to resolve their uncommitted fate (as is characteristic of the majority of nascent ICM cells at  
73 E3.5 (Chazaud et al., 2006)) and thus, functionally diverge and segregate from the EPI lineage (Thamodaran  
74 and Bruce, 2016). Although, p38-MAPK (and their related paralogs, p38 $\gamma/\delta$ ) belong to the wider family of serine-  
75 threonine and tyrosine kinases, regulating a wide variety of cellular functions (Cargnello and Roux, 2011), they  
76 differ from the other family members, such as extra-cellular regulated kinases [*e.g.* ERK1/2 – themselves  
77 implicated in FGF-mediated PrE differentiation at a developmental point succeeding that identified for p38-MAPK  
78 (Nichols et al., 2009;Yamanaka et al., 2010;Frankenberg et al., 2011;Kang et al., 2013;Thamodaran and Bruce,  
79 2016)] in that they are classically known to be activated by extracellular stress stimuli; for example pro-  
80 inflammatory cytokines, U.V. radiation and physical stress, rather than liganded growth-factor associated receptor  
81 tyrosine kinases (Remy et al., 2010). It is estimated activated p38-mitogen activated kinases in general are able to  
82 phosphorylate and regulate between 200-300 cellular substrates (Cuadrado and Nebreda, 2010;Trempelec et al.,  
83 2013;Hornbeck et al., 2019). In the context of this study, there is precedent for the involvement of active p38-  
84 MAPK in amino acid (AA) signalling (Casas-Terradellas et al., 2008) and regulation of autophagy (Webber, 2010),  
85 in other non-embryo models.

86

87 The ‘Developmental Origin of Health and Disease’ (DOHaD) model hypothesises environmental cues, particularly  
88 nutrient availability, during the peri-conceptual days of development manifests changes in embryonic metabolism  
89 and development, with potential pathological consequences extending into adulthood (O'Brien, 1999).  
90 Rodent pups born to mothers exposed to low protein diets during preimplantation stages of development  
91 are reported to have significantly increased birth weight, elevated systolic blood pressure, liver  
92 hypertrophy, cardiovascular and metabolic disorders, aberrant establishment of gene imprints plus  
93 hyperactive behaviour and poor memory (Kwong et al., 2000;Kwong et al., 2006;Fleming et al.,  
94 2015;Fleming et al., 2018). Such observations are indicative of adaptive and persistent changes in early  
95 embryo physiology/metabolism; indeed, similar studies report increased endocytosis and nutrient uptake in  
96 the extraembryonic TE and PrE lineages, arising from altered epigenetic gene regulation (Sun et al.,

97 2014;Sun et al., 2015). Thus, mounting evidence corroborates the incidence of the DOHaD model, yet there is  
98 a comparative dearth of detailed and supportive molecular mechanistic data that could underpin how  
99 preimplantation stage embryos react and develop under conditions of nutrient deprivation.

100  
101 Accordingly, we have examined our previously identified p38-MAPK inhibition induced defective PrE phenotypes,  
102 themselves associated with reduced blastocyst cell number (Thamodaran and Bruce, 2016), to ascertain if p38-  
103 MAPK not only regulates PrE differentiation *per se*, but also perform a dual regulative/homeostatic role in  
104 mediating preimplantation mouse embryo/blastocyst development in response to limited amino acid (AA)  
105 availability, as could be inferred from earlier studies (Kwong et al., 2000;Kwong et al., 2006;Sun et al.,  
106 2014;Fleming et al., 2015;Sun et al., 2015;Fleming et al., 2018) addressing DOHaD.

## 107 **Materials & Methods**

### 109 **Mouse lines and embryo culture.**

110 All experimental procedures relating to mice (*i.e.* derivation of preimplantation stage embryos for further  
111 study) complied with ‘ARRIVE’ guidelines and were carried out in accordance with EU Directive 2010/63/EU (for  
112 animal experiments). Superovulation and strain mating regime to produce embryos for the experiments are shown  
113 in the figures and are as previously described (Mihajlovic et al., 2015). E1.5 (*i.e.* 2-cell) stage embryos were  
114 isolated from the oviducts of the females in M2 media (pre-warmed at 37°C for at least 2-3 hours) and thereafter  
115 cultured in KSOM (EmbryoMax® KSOM Mouse Embryo Media; cat. # MR-020P-5F - pre-warmed and  
116 equilibrated in 5% CO<sub>2</sub> and 37°C), either with or without amino acid (AA) supplementation. For KSOM+AA  
117 condition, Gibco™ MEM Non-Essential Amino Acids Solution (100X) (cat. # 11140035) and Gibco™ MEM  
118 Amino Acids Solution (50X) (cat. # 11130036) were used to a working concentration of 0.5X. Embryos were  
119 cultured in micro-drops prepared in 35mm tissue culture dishes covered with light mineral oil (Irvine Scientific.  
120 cat. # 9305), in 5% CO<sub>2</sub> incubators maintained at 37°C until the appropriate stage and thereafter were analysed  
121 according to the experimental design. Chemical inhibition of p38-MAPKs was carried out using SB220025  
122 (Calbiochem® cat. # 559396; dissolved in dimethyl sulfoxide/DMSO) at 20µM working concentration in the  
123 respective culture medium, as described previously (Thamodaran and Bruce, 2016). DMSO (Sigma-Aldrich® cat.  
124 # D4540) of equivalent volume was used as solvent control to a final working concentration of 0.2% by volume.  
125 Embryos with a blastocoel cavity occupying approximately 50% of the volume of the embryo at 12.00 hours on  
126 E3.5 were moved to either inhibitory or control culture conditions and cultured for a further 24 hours (*i.e.* E4.5).  
127 Rescue experiments were similarly performed by further addition of N-Acetyl-L-cysteine (NAC, dissolved in  
128 water; Sigma-Aldrich® cat. # A7250) to a final working concentration of 1 or 10mM in respective culture medium.  
129 All KSOM based culture media, with or without additional chemicals (AAs, inhibitors or anti-oxidants), was pre-  
130 warmed and equilibrated in 5% CO<sub>2</sub> and 37°C for at least 3-4 hours prior to embryo transfer.

### 131 **Bright-field microscopy, immunofluorescence staining, confocal microscopy and image analysis.**

132 Bright-field images were captured using Olympus IX71 inverted fluorescence microscope and Optika  
133 TCB3.0 imaging unit along with the associated Optika Vision Lite 2.1 software. To remove the *zona pellucida*,  
134 blastocysts were quickly washed and pipetted in pre-warmed drops of Tyrode’s Solution, Acidic (Sigma-Aldrich®  
135 cat. # T1788), until the *zona* was visually undetectable, immediately followed by washes through pre-warmed  
136 drops of M2 media. Thereafter embryos were fixed, in the dark, at stages with 4% paraformaldehyde (Santa Cruz  
137 Biotechnology, Inc. cat. # sc-281692) for 20 minutes at room temperature. Permeabilisation was performed by  
138 transferring embryos to a 0.5% solution of Triton X-100 (Sigma-Aldrich® cat. # T8787), in phosphate buffered  
139 saline (PBS), for 20 minutes at room temperature. Washes post-fixation, permeabilisation and antibody staining  
140 were performed in PBS with 0.05% of TWEEN® 20 (Sigma-Aldrich® cat. # P9416) (PBST) by transferring  
141 embryos between two drops or wells (of 96-well micro-titre plates) of PBST, for 20 minutes at room temperature.  
142 Blocking and antibody staining was performed in 3% bovine serum albumin (BSA; Sigma-Aldrich® cat. # A7906)  
143 in PBST. Blocking incubations of 30 minutes at 4°C were performed before both primary and secondary antibody  
144 staining; primary antibody staining (in blocking buffer) was incubated overnight (~16 hours) at 4°C and secondary  
145 antibody staining carried out in the dark at room temperature for 70 minutes. Stained embryos were mounted in

146 DAPI containing mounting medium VECTASHIELD® (Vector Laboratories, Inc. cat. # H-1200), placed on cover  
147 slips and incubated at 4°C for 30 minutes in the dark, prior to confocal imaging. Details of the primary and  
148 secondary antibody combinations used can be found in the supplementary information (table S4). Confocal images  
149 were acquired using a FV10i Confocal Laser Scanning Microscope and FV10i-SW image acquisition software  
150 (Olympus®). Images were analysed using FV10-ASW 4.2 Viewer (Olympus®) and Imaris X64 Microscopy Image  
151 Analysis Software (version 6.2.1; Bitplane AG (Oxford Instruments plc). Cells were counted manually and  
152 automatically using Imaris X64.

### 153 **Cell number quantification, statistics and graphical representation.**

154 Total cell number counts (based on DAPI nuclei staining) were further sub categorised as EPI or PrE cells  
155 based on detectable and exclusive NANOG and GATA4 (confocal images in figure 1 and graphs in figure 2, 4 and  
156 5) or GATA6 (confocal images and graphs in figure 5) double immuno-staining, respectively. Cells not located  
157 within blastocyst ICMs that also did not stain for either GATA4 and/or NANOG, were designated as outer/ TE  
158 cells. Specifically relating to figure 5, ICM cells that were positively stained for both GATA6 and NANOG at E4.5  
159 were designated as uncommitted in terms of cell fate. Initial recording and data accumulation was carried out using  
160 Microsoft Excel and further statistical analysis and graphical representations performed with GraphPad Prism 8. A  
161 Mann-Whitney pairwise statistical test was employed. Unless otherwise stated within individual graphs as a  
162 specific P value (if statistically insignificant), the stated significance intervals were depicted as such: P value <  
163 0.0001 (\*\*\*\*), 0.0001 to 0.001 (\*\*\*), 0.001 to 0.01 (\*\*) and 0.01 to 0.05 (\*). All graphs represent dot plots of the  
164 total sample size, with associated means and the standard error bars highlighted. Supplementary table S5  
165 summarises the results of additional Welch's ANOVA tests performed across DMSO and p38-MAPK inhibited  
166 conditions in which either no NAC, 1mM NAC and 10mM NAC, was supplemented to both KSOM and  
167 KSOM+AA conditions. Analysis was performed using GraphPad Prism 8, P values are numerically stated, and  
168 significance intervals are depicted as such: P value < 0.0001 (\*\*\*\*), 0.0001 to 0.001 (\*\*\*), 0.001 to 0.01 (\*\*) and  
169 0.01 to 0.05 (\*).

170

### 171 **Quantitative real-time PCR (Q-RT-PCR).**

172 2-cell stage (E1.5) embryos were collected and cultured in KSOM+AA until E3.5 (*i.e.* at 12:00 hours)  
173 stage and then equally distributed in to four experimental pre-equilibrated media conditions (*i.e.* i. KSOM +DMSO,  
174 ii. KSOM +SB220025, iii. KSOM+AA +DMSO and iv. KSOM+AA +SB220025). At 22:00 hours (*i.e.* 10 hours of  
175 treatment), 25 embryos from each condition were collected immediately processed for RNA extraction and  
176 isolation using the ARCTURUS® PicoPure® RNA Isolation Kit (Applied Biosystems™; catalogue number  
177 KIT0204), following the manufacturer's protocol. The entire eluted volume of total RNA was immediately DNase  
178 treated with Invitrogen™ TURBO™ DNase (Catalogue number: AM2238) according to the manufacturer provided  
179 protocol. The whole sample was then subject to cDNA synthesis using Invitrogen™ SuperScript™ III Reverse  
180 Transcriptase (Catalogue number: 18080044), as directed by the manufacturer and employing Invitrogen™ Oligo  
181 d(T)16 (Catalogue number: N8080128), ThermoScientific™ dNTP Mix (Catalogue number: R0192) and Applied  
182 Biosystems™ RNase Inhibitor (Catalogue number: N8080119). The final cDNA volume of 30µl was diluted to  
183 45µl with nuclease free water and 1µl used in 10µl individual final SYBR-green based Q-RT-PCR reaction  
184 volumes (qPCRBIO SyGreen Mix Lo-ROX - Catalogue number: PB20.11). A Bio-Rad CFX96 Touch Real-Time

185 PCR Detection System apparatus, employing standard settings, was employed for data accumulation and initial  
186 analysis was performed with the accompanying Bio-Rad CFX Manager™ software. Triplicate measurements per  
187 gene (the sequence of individual oligonucleotide primers, used at a final concentration of 300nM, are provided in  
188 supplementary table S6) were assayed from two biological replicates that were each technically replicated. The  
189 averaged transcript levels of analysed genes (*i.e.* *Cat*, *Sod1* and *Sod2*) were derived after internal normalisation  
190 against *H2afz* mRNA levels, in four experimental culture conditions assayed. As such data was acquired and  
191 initially analysed with CFX Manager™, then processed in Microsoft Excel (biological and technical replicate  
192 averaging) and GraphPad Prism 8 (graphical output). Welch's ANOVA statistical significance test followed by  
193 Dunnett's T3 multiple comparisons test were employed. Unless otherwise stated within individual graphs as a  
194 specific P value (if statistically insignificant), the stated significance intervals were depicted as: P value < 0.0001  
195 (\*\*\*\*), 0.0001 to 0.001 (\*\*\*), 0.001 to 0.01 (\*\*), and 0.01 to 0.05 (\*); error bars denote calculated standard  
196 deviations.

### 197 198 **Blastocyst Reactive Oxygen Species (ROS) staining.**

199 Collected 2-cell stage embryos were cultured in KSOM until E3.5 (12:00) then moved to either KSOM  
200 +DMSO or KSOM +SB220025 (pre-equilibrated for 3 hours prior) and cultured for another 6 hours (*i.e.* E3.75;  
201 alternatively expressed as 18:00 hours on the same day) or to E4.25 (*i.e.* until 06:00 hours the next day). Thereafter  
202 embryos were transferred to M2 media containing 5µM Invitrogen™ CellROX™ Green Reagent (a ROS specific  
203 reporter dye; catalogue number: C10444), that had been pre-equilibrated in the dark at 37°C for 30 minutes, and  
204 incubated under the same conditions for 30 minutes before being washed through two drops of regular M2 media.  
205 Whereas E3.75 (n=2 per experimental group) embryos were immediately live mounted M2 drops and imaged under  
206 the confocal microscope (FV10i, Olympus®, using appropriate preparatory CellROX™ Green filter settings), those  
207 ROS stained embryos collected at E4.25 (KSOM +DMSO, n=14; KSOM +SB220025, n=15) were fixed in 4%  
208 paraformaldehyde prior to confocal microscopic imaging. Confocal images are depicted as projections of  
209 individual z-stack images using the FV10i-SW image acquisition software (Olympus®) rainbow spectral intensity  
210 palette (from blue to white, representing lowest to highest signal intensities). All the images in each group (*i.e.*  
211 E3.75 and E4.25) were acquired at equal laser intensity and detector sensitivity. The number of ROX-positive/  
212 staining foci in the z-stack projections of individual embryos fixed at E4.25 were quantified using Image J  
213 (<http://rsbweb.nih.gov/ij/>), by first subtracting background (using a rolling ball radius of 50 pixels) and invoking  
214 the 'finding maxima tool' (prominence>5). The counted number of foci were statistically verified and graphically  
215 depicted using GraphPad Prism 8; statistical test employed was an unpaired, two-tailed t-tests. Unless otherwise  
216 stated within individual graphs as a specific P value (if statistically insignificant), the stated significance intervals  
217 are depicted: P value < 0.0001 (\*\*\*\*), 0.0001 to 0.001 (\*\*\*), 0.001 to 0.01 (\*\*), and 0.01 to 0.05 (\*). The graphs  
218 represent dot plot of total sample size together with mean and the standard deviation bars indicated.

### 219 220 **Phosphorylated/ activated p38-MAPK western blotting and quantification**

221 Collected 2-cell stage embryos were cultured in either KSOM or KSOM+AA until E3.5 (12:00 hours) or  
222 E3.75 (18.00 hours) and 20-40 embryos processed for western/immunoblotting per culture condition; briefly  
223 embryos were washed through two drops of Dulbecco's PBS (Sigma-Aldrich; catalogue number: BSS-1005-B),  
224 transferred to 1.5 ml microfuge tubes (removing excess PBS) and flash frozen in liquid nitrogen. To prepared

225 samples 10  $\mu$ L of 10x SDS reducing agent/loading buffer (NuPAGE buffer, ThermoFisher Scientific, NP 0004,  
226 ThermoFisher Scientific) was added and then boiled at 100°C for 5 minutes. Loaded proteins were then  
227 electrophoretically separated on gradient precast 4–12% SDS–PAGE gels (ThermoFisher Scientific, NP0323) and  
228 transferred to Immobilon P membranes (Merck group, IVPD00010) using a semi-dry blotting system (Biometra/  
229 Analytik Jena) for 25 minutes at 5mA/ cm<sup>2</sup>. Blotted membranes were blocked in 5% skimmed milk powder  
230 dissolved in 0.05% Tween-Tris pH 7.4 buffered saline (TTBS), for 1 hour, briefly rinsed in TTBS and then  
231 incubated overnight at 4°C overnight in 1% milk/TTBS containing primary antibody (against phosphorylated p38-  
232 MAPK). Membranes were washed in three changes of TTBS buffer (20 minutes each at room temperature) and  
233 anti-immunoglobulin-species-specific-peroxidase conjugated secondary antibody added to the blot in 1%  
234 milk/TTBS, for 1 hour (room temperature). Immuno-detected proteins were visualized by chemiluminescent  
235 photographic film exposure (ECL kit; GE Life Sciences, RPN2232) and digitally scanned using a GS-800  
236 calibrated densitometer (Bio-Rad Laboratories) and quantified using ImageJ (<http://rsbweb.nih.gov/ij/>). Antibody  
237 stripped membrane blots were re-probed and quantified, for loading controls (detecting GAPDH), in an identical  
238 manner. Note, presented quantified data (Fig. 3f) of GAPDH normalised phosphorylated p38-MAPK levels are  
239 taken from two independent biological replicates. Supplementary table S4 details the identity and utilised  
240 concentrations of the primary and peroxidase-conjugated antibodies used.



## 241 Results & Discussion

### 242 243 **p38-MAPK activity buffers amino acid availability to ensure germane blastocyst maturation and** 244 **appropriate ICM cell lineage derivation.**

245 As outlined above, we assayed the effect of exogenous AA supplementation on *in vitro* mouse blastocyst  
246 formation, assaying total, outer/TE, overall ICM, pluripotent EPI and PrE cell numbers. Concomitantly, we  
247 analysed the effect of pharmacological p38-MAPK inhibition [using SB220025 (Jackson et al., 1998)], given our  
248 previously identified role for p38-MAPK in regulating PrE specification and formation during the blastocyst  
249 maturation developmental window [E3.5-E4.5 (Thamodaran and Bruce, 2016)]. Accordingly, 2-cell stage mouse  
250 embryos were *in vitro* cultured until the early blastocyst stage (E3.5) in a commonly utilised and chemically  
251 defined commercial growth media lacking AAs (except L-glutamine; KSOM) or the identical media supplemented  
252 with essential and non-essential AAs (KSOM+AA). Embryos were then switched to the equivalent media  
253 containing either SB220025 or DMSO (vehicle control), further cultured to the late blastocyst stage (E4.5), fixed  
254 and immuno-fluorescently stained for EPI (NANOG) or PrE (GATA4) marker protein expression. Irrespective of  
255 AA supplementation status, we did not observe any morphological differences between the DMSO control treated  
256 groups; each yielding hatching blastocysts with appropriately large cavities (Fig. 1b and b') and ICMs consisting a  
257 NANOG positive (NANOG+) EPI compartment overlaid with mono-layered GATA4 positive (GATA4+) PrE cells  
258 (Fig. 1d and f). Neither the average number of total, outer and inner (including PrE and EPI) cells, nor the PrE:total  
259 ICM cell number ratio, were significantly different between each of the DMSO treated control groups (Fig. 2).  
260 Thus, exogenous AA supplementation did not overtly affect embryonic/blastocyst development or ICM lineage  
261 derivation during the preimplantation period (notwithstanding possible undetectable changes, possibly epigenetic in  
262 origin, that may potentially underpin any subsequent DOHaD phenotypes). Similar inspection of the p38-MAPK  
263 inhibited groups confirmed our previously reported data (Thamodaran and Bruce, 2016), whereby blastocysts were  
264 morphologically smaller (particularly the KSOM group) (Fig. 1c and c') and had a robust PrE deficit (note lack of  
265 GATA4+ cells Fig. 1e, e', g and g'). Indeed, a detailed analysis of cell numbers (Fig. 2) revealed the p38-MAPK  
266 inhibited embryos that were cultured in KSOM were significantly more adversely affected than those cultured in  
267 KSOM+AA, comprising fewer overall, outer and inner cells, although both inhibited groups had significantly  
268 fewer cells than their equivalent DMSO controls. Furthermore, p38-MAPK inhibited embryos cultured in KSOM  
269 also had significantly fewer EPI cells (5.81 cells) than either p38-MAPK inhibited blastocysts cultured in  
270 KSOM+AA (9.49 cells) or the appropriate DMSO treated KSOM control groups (10.07 cells) (Fig. 2d). This trend  
271 was also observed in the PrE, albeit representing a small difference in the overall magnitude; *i.e.* an average  
272 difference of 1.14 cells between the KSOM+AA and KSOM conditions under p38-MAPK inhibition (0.78 cells in  
273 KSOM and 1.92 in KSOM+AA, compared with 6.36 and 7.01 in the respective control DMSO conditions - Fig.  
274 2e). p38-MAPK inhibition, thus, severely attenuated PrE differentiation irrespective of AA supplementation status,  
275 with the magnitude of the effect being marginally greater, yet reaching statistical significance, in blastocysts  
276 matured in KSOM media. Interestingly, there was no similar robust reduction in EPI cells in p38-MAPK inhibited  
277 embryos from the KSOM+AA cultured group (10.55 cells in control vs. 9.49 in inhibited conditions), in line with  
278 our previous observations (Thamodaran and Bruce, 2016). Collectively, these data confirm maximally reduced cell  
279 number phenotypes associated with p38-MAPK inhibition under non-supplemented KSOM culture conditions, and  
280 indicate a developmental buffering capacity of active p38-MAPK (that potentially ensures required AA

281 availability) that is necessary for appropriate blastocyst development/maturation. However, the fact that exogenous  
282 AA supplementation is able to elicit a near complete rescue EPI cell number deficits caused by p38-MAPK  
283 inhibition but only has a marginal effect on robustly impaired PrE differentiation, demonstrates such a regulative  
284 AA-related homeostatic role of p38-MAPK to be distinct and independent of that it fulfils in potentiating PrE  
285 differentiation (Thamodaran and Bruce, 2016).

286 How active p38-MAPK executes this homeostatic role in the absence of exogenous AAs (see KSOM  
287 +DMSO conditions Figs.1&2) is unclear but may involve sequestration of intra-cellular sources of AA via  
288 regulated autophagy, as reported in other non-embryo-related models/systems (Corcelle et al., 2007;Webber,  
289 2010;Webber and Tooze, 2010;Henson et al., 2014). Consistently, p38-MAPK has also been reported to regulate  
290 mTOR containing complexes, involved in balanced metabolism, cell growth/proliferation control and autophagy  
291 (Casas-Terradellas et al., 2008;Cully et al., 2010;Wu et al., 2011;Gutierrez-Uzquiza et al., 2012;Linares et al.,  
292 2015). Moreover, partial mTOR inhibition in mouse blastocysts is known to induce a state of developmental  
293 diapause (Bulut-Karslioglu et al., 2016), whilst relative differences in mTOR activity (linked to p53 activity) have  
294 been reported as a mechanism by which cells exiting the naive pluripotent state compete and are potentially  
295 eliminated from early post-implantation embryonic tissues (Bowling et al., 2018). It would be interesting to  
296 investigate further the potential regulation of mTOR via p38-MAPK. Interestingly, there also exists precedent from  
297 cell line models for atypical glucose induced autophagy, which is independent of mTOR and relies on p38-MAPK.  
298 This mechanism of glucose induced and p38-MAPK dependant autophagy is however only operative under  
299 conditions of nutrient deprivation, such as depletion of exogenously provided AAs (Moruno-Manchon et al., 2013).  
300 Given the base media (*i.e.* KSOM) used in this study contains glucose, it is possible a similar mechanism of  
301 induced and p38-MAPK dependent autophagy is responsible for the overtly normal blastocyst maturation observed  
302 in DMSO treated control embryos cultured in the AA-free non-supplemented KSOM.

### 304 **p38-MAPK counteracts amino acid depletion induced oxidative stress during blastocyst maturation.**

305 AA starvation is closely linked to increased oxidative stress (Harding et al., 2003), whereby induced anti-  
306 oxidant mechanisms, involving *de novo* protein expression, are impaired (Vucetic et al., 2017). Additionally,  
307 activated p38-MAPK (specifically p38 $\alpha$ ) has been reported to orchestrate the induced/stabilised expression of  
308 enzymatic antioxidants (Gutierrez-Uzquiza et al., 2012). Therefore, given the morula to blastocyst transition in  
309 mouse preimplantation development is accompanied by a large increase in glucose utilisation and oxygen  
310 consumption (Brown and Whittingham, 1991;Leese, 2012), with the potential to contribute elevated levels of  
311 reactive oxygen species (Murphy, 2009;Harvey, 2019), we hypothesised the observed aggravated effect of p38-  
312 MAPK inhibition in the absence of AA supplementation was contributed by increased oxidative stress. In support  
313 of this model, we could directly detect increased levels of ROS (using a ROX-dye) in blastocysts under p38-MAPK  
314 inhibited conditions in both live E3.75 –(Fig. 3b, upper panels) and fixed E4.25 (Fig. 3b, lower panels and Fig. 3c,  
315 detailing quantification of the average number of ROX-positive foci per embryo) stage embryos, cultured in non-  
316 supplemented KSOM (see also supplementary Fig. S1, detailing projected z-section confocal micrographs of all  
317 ROX stained E4.25 stage fixed embryos used in ROS quantification). Additionally, a comparative and quantitative  
318 assay of the levels of functionally active phosphorylated p38-MAPK protein in blastocysts derived after culture in  
319 either KSOM or KSOM+AA, reported enhanced levels of active p38-MAPK in the KSOM cultured group  
320 condition at both E3.5 and E3.75 (Fig. 3e and f); *i.e.* the culture condition, with AA supplementation, already

321 shown to be most sensitive to the effects of p38-MAPK inhibition (Figs. 1 and 2). In further support of the model,  
322 we could also detect significantly enhanced expression of recognised mRNA transcripts for enzymatic antioxidants  
323 [*i.e.* Catalase/ *Cat* and Superoxide-dismutases 1 & 2/ *Sod1* & *Sod2* (Gutierrez-Uzquiza et al., 2012)] in control  
324 DMSO treated blastocysts cultured in un-supplemented KSOM versus KSOM+AA. Moreover, in the case of *Cat*  
325 and *Sod2* expression, such comparatively enhanced levels could be attenuated by p38-MAPK inhibition, although  
326 not to levels observed in blastocysts cultured in KSOM+AA (Fig. 3c – note all blastocysts were initially cultured in  
327 KSOM+AA until E3.5, before being transferred to one of the four assayed media conditions). Collectively, these  
328 data support the hypothesis that increased oxidative stress caused by a lack of exogenous AA media  
329 supplementation is buffered by active p38-MAPK to ensure germane blastocyst development and the potential to  
330 adopt appropriate ICM cell fates.

331 Accordingly, we therefore tested if blastocyst cell number deficits caused by p38-MAPK inhibition could  
332 be ameliorated by providing exogenous anti-oxidants to the culture media. Thus, we repeated the cell counting  
333 experiments described above, including extra conditions in which cultured blastocysts (E3.5-E4.5), under control  
334 (DMSO) and p38-MAPK inhibited conditions, were provided the antioxidant N-acetyl-cysteine (NAC; either 1mM  
335 or 10mM - Fig. 4). Focussing on the non-supplemented (KSOM) group, we observed that NAC addition to control  
336 DMSO treated embryo groups had no significant effect on average total, outer or inner cell number; nor EPI/ PrE  
337 derivation (*n.b.* PrE:ICM ratio; Fig. 4b-g and supplementary table S5: Welch's-ANOVA test), suggesting a lack of  
338 significant oxidative stress under control conditions. However, under p38-MAPK inhibited conditions, NAC  
339 supplementation caused significant increases (*i.e.* 'rescues') in all but EPI cell numbers (Fig. 4b-g and  
340 supplementary table S5), when compared with p38-MAPK inhibition in the absence of NAC; indicating a role for  
341 p38-MAPK in mitigating depleted AA induced oxidative stress. A marked divergent effect was indeed observed in  
342 respect to the two ICM cell lineages. Whilst, NAC treatment did not significantly alter the average number of EPI  
343 (NANOG+) cells under p38-MAPK inhibition (5.81, 7.13 and 6.78 in non-supplemented, 1mM and 10mM NAC  
344 conditions respectively; Fig. 4e), the number of PrE cells (GATA4+) was significantly increased (0.78, 1.55 and  
345 2.83 in non-supplemented, 1mM and 10mM NAC conditions respectively; Fig. 4f), with an improving trend  
346 towards higher concentrations of NAC (Fig. 4f and g). Therefore, these data strongly imply that under conditions of  
347 exogenous AA depletion, p38-MAPK activity specifically supports the development of differentiating  
348 extraembryonic lineages (TE and PrE) by combating induced oxidative stress (as revealed by the described rescue  
349 phenotypes associated with concomitant p38-MAPK inhibition and NAC supplementation). Moreover, the data  
350 also suggest this anti-oxidant role is not extended to the pluripotent EPI and confirm that PrE differentiation, *per*  
351 *se*, is sensitive to oxidative stress. These data accord with our previous observations that p38-MAPK inhibition  
352 specifically impairs PrE cell-fate derivation, by preventing resolution of initially uncommitted cell fate states  
353 within early blastocyst ICMs, without significantly influencing EPI formation (Thamodaran and Bruce, 2016)  
354 (recapitulated here; KSOM+AA - Figs.2 & 4). However, the observed NAC-derived rescue effects were only  
355 partial when compared to average cell numbers recorded in the appropriate DMSO control groups, and with the  
356 exception of GATA4+ PrE derivation, were not further enhanced by the higher (10mM) NAC concentration.  
357 Indeed, increased/rescued total, outer and PrE cell numbers in NAC treated p38-MAPK inhibited embryos, in the  
358 KSOM group, were only equivalent to those observed in the corresponding KSOM+AA conditions (Fig. 4). This  
359 suggests further, as yet unknown, p38-MAPK regulated mechanisms (unrelated to oxidative stress) must also  
360 contribute to ensure appropriate numbers of total, outer (TE) and PrE cells during blastocyst maturation. However,

361 the present data confirm the existence of at least a dual role of p38-MAPK during blastocyst maturation. Firstly,  
362 that concerned with homeostatic regulation of AA availability and associated oxidative stress and secondly, that by  
363 which p38-MAPK directly regulates PrE specification/ differentiation, as previously described (Thamodaran and  
364 Bruce, 2016).

365 It is noteworthy that a study employing cancer cell line models reports p38-MAPK as elevating glucose  
366 uptake but shunting its metabolism away from glycolysis in favour of the pentose phosphate pathway to generate  
367 increased levels of NADPH that are required to counteract reactive oxygen species (ROS) (Desideri et al., 2014).  
368 Thus, it is tempting to speculate a similar mechanism to counteract ROS, under depleted AA conditions, may also  
369 be operative in the blastocyst. Interestingly, recently available preprint study data compellingly report the  
370 importance of blastocyst cavity expansion for PrE specification (<https://doi.org/10.1101/575282>); given  
371 such expansion requires a functioning TE (Madan et al., 2007), it is possible any impairment in TE cell  
372 number/ function could negatively impact this process. Consistently, we have observed the blastocyst  
373 cavities of p38-MAPK inhibited blastocysts to be visibly smaller than controls (Fig. 1b to c'; highlighted by  
374 black arrowheads), irrespective of AA supplementation status. Reports relating to glioblastoma cancer  
375 models have also clearly uncovered p38-MAPK dependant mechanisms of cell survival, involving induction  
376 of the *Cox2* gene (catalysing the committed step in prostaglandin synthesis) (Parente et al., 2013) and that  
377 have been linked to AA starvation (Li et al., 2017). However, it is improbable p38-MAPK exerts a similar role  
378 in the mouse blastocyst ICM, as we were unable to detect any basal or induced, as the recognised mechanism  
379 of regulated expression (Smith et al., 2000), *Cox2* derived mRNA transcripts in either the control or  
380 experimental conditions (as stated in Fig. 3h), again irrespective of KSOM media AA supplementation status.  
381 Lastly, we found the addition of NAC to p38-MAPK inhibited blastocysts under KSOM+AA culture conditions  
382 had no significant effects (Fig. 4b'-f' and supplementary table S5), suggesting AA supplementation alone is  
383 sufficient to mitigate deleterious oxidative stresses (potentially caused by increased ROS production) associated  
384 with p38-MAPK inhibition. However, the fact p38-MAPK inhibition was still associated with significantly reduced  
385 total, outer and PrE cell numbers further supports the existence of additional uncharacterised, yet p38-MAPK  
386 mediated, mechanism(s) of supporting appropriate blastocyst cell number.

387  
388 **p38-MAPK dependent homeostatic regulation of amino acid availability, and associated depletion induced**  
389 **oxidative stress, facilitates PrE progenitor specification from an initially uncommitted state of cell fate,**  
390 **during blastocyst maturation.**

391 Cells of maturing mouse blastocysts ICM (E3.5 - E4.5) transit from an initially uncommitted state,  
392 expressing both NANOG (EPI) and GATA6 (PrE), via an intermediate stage whereby progenitors of each lineage  
393 express either marker in a randomly distributed and mutually exclusive manner (the so-called 'salt & pepper'  
394 pattern), culminating in the separated late blastocyst tissue layers (PrE having initiated further marker protein  
395 expression; e.g. SOX17 and GATA4 (Kuo et al., 1997;Chazaud et al., 2006;Niakan et al., 2010)). We previously  
396 reported p38-MAPK inhibition during this developmental window significantly impairs PrE (GATA4+), but not  
397 EPI (NANOG+), formation by retaining PrE progenitor cells in the uncommitted state (Thamodaran and Bruce,  
398 2016). Given such experiments were performed in KSOM+AA, we now decided to also assay PrE specification  
399 from the uncommitted state in KSOM cultured blastocysts, in the presence/absence of NAC. Consistent with our

400 previous study (Thamodaran and Bruce, 2016), the inhibition of p38-MAPK in blastocysts cultured in KSOM+AA  
401 was associated with increased numbers of uncommitted/ PrE progenitor ICM cells (co-expressing NANOG and  
402 GATA6 - illustrated by an increase in the uncommitted cell:total ICM ratio– Fig. 5e’). However, NAC  
403 supplementation resolved this uncommitted state to levels observed in corresponding DMSO treated controls  
404 (reaching significance at 10mM NAC). These data suggest p38-MAPK inhibition in KSOM+AA media is  
405 associated with levels of oxidative stress, that represent an impediment to PrE progenitor specification in the  
406 blastocyst (*i.e.* a resolution of the uncommitted state by downregulating NANOG and maintaining GATA6  
407 expression). Moreover, they invoke an endogenous anti-oxidant role for p38-MAPK that promotes PrE  
408 specification, although crucially such a role is not alone sufficient to ensure full differentiation as marked by  
409 GATA4 expression (discussed above - Fig. 4). Whereas in KSOM cultured p38-MAPK inhibited blastocysts, the  
410 observed uncommitted ICM phenotype (NANOG and GATA6 co-expression) was much more robust (affecting  
411 virtually all ICM cells - *i.e.* progenitors of PrE and EPI alike; Fig. 5c & e). Such data suggest a lack of AA  
412 supplementation itself, coupled with p38-MAPK inhibition, severely impairs resolution of the uncommitted state  
413 towards either PrE or EPI (even if some very limited initiation of GATA4 expression can occur later - Figs.1, 2 &  
414 4). This is opposed to the effect of p38-MAPK inhibition in KSOM+AA, whereby only resolution of uncommitted  
415 cells to PrE is impaired [Fig. 5e’ (Thamodaran and Bruce, 2016)]. Addition of NAC to DMSO treated control  
416 KSOM culture groups revealed that the antioxidant alone, in the absence of supplemented AAs, promotes  
417 resolution of the uncommitted state (reaching significance at 10mM NAC), although as reference above this is not  
418 translated to full PrE differentiation (as marked by GATA4 expression – Figs. 1, 2 & 4). However, the effect is  
419 blunted under p38-MAPK inhibited conditions with only a sub-population of embryos resolving NANOG and  
420 GATA6 co-expression patterns (Fig. 5d & d’).

421 Therefore, AA supplementation can ameliorate developmentally persistent, p38-MAPK inhibition  
422 associated, uncommitted ICM/PrE cell fates that can be further augmented by additional anti-oxidant treatment  
423 using NAC. As NAC mediated resolution of such p38-MAPK inhibition induced uncommitted states (affecting EPI  
424 and PrE progenitors) is not as efficient in the absence of exogenous AA, a PrE specification/ differentiation  
425 promoting role of p38-MAPK, regulating appropriate amino acid homeostasis and counteracting oxidative stress, is  
426 further supported.

427 **Conclusions**

428 Our data reveal novel AA sensing and regulative/ homeostatic buffering mechanisms, centred on p38-  
429 MAPK, that counteract oxidative stress and ensure germane mouse blastocyst development; manifest in appropriate  
430 cell number and resolution of uncommitted EPI/PrE progenitors within the ICM (summarised in Fig. 5f). These  
431 findings resonate with DOHaD models, illustrating how varying nutritional status can place regulatory/metabolic  
432 burdens upon the early embryo, with consequences for the differentiation of an extraembryonic tissue, later relied  
433 upon during *in utero* development of the foetus. The results also provide important considerations for improved  
434 assisted reproductive technologies that necessitate *in vitro* human embryo culture.

435 **Contributions & acknowledgements**

436 Project contributions; experimental design (P.B., T.V. & A.W.B.), practical research (P.B. & T.V.),  
437 western blotting experiments (P.B. & A.Š.), data analysis (P.B. & A.W.B.) and manuscript preparation (P.B. &  
438 A.W.B). We acknowledge Institute of Parasitology, Biology Centre (in České Budějovice), Czech Academy of  
439 Sciences for housing mice, Marta Gajewska (Institute of Oncology, Warsaw, Poland) and Anna Piliszek (Institute  
440 of Genetics & Animal Breeding, Polish Academy of Sciences, Jastrzębiec, Poland) for founder CBA/W mice,  
441 Alena Krejčí (Faculty of Science, University of South Bohemia, Czech Republic) for pooling resources and other  
442 members of our laboratory (LEMDB – particularly Lenka Gahurová) for valuable inputs and discussions. This  
443 work was supported by grants from the Czech Science Foundation/GAČR (18-02891S) and Grant Agency of the  
444 University of South Bohemia (GAJU; 012/2019/P).

445

## References

- 446 Bowling, S., Di Gregorio, A., Sancho, M., Pozzi, S., Aarts, M., Signore, M., M, D.S., Martinez-Barbera,  
447 J.P., Gil, J., and Rodriguez, T.A. (2018). P53 and mTOR signalling determine fitness selection  
448 through cell competition during early mouse embryonic development. *Nat Commun* 9, 1763.
- 449 Brown, J.J., and Whittingham, D.G. (1991). The roles of pyruvate, lactate and glucose during  
450 preimplantation development of embryos from F1 hybrid mice in vitro. *Development* 112, 99-105.
- 451 Bulut-Karslioglu, A., Biechele, S., Jin, H., Macrae, T.A., Hejna, M., Gertsenstein, M., Song, J.S., and  
452 Ramalho-Santos, M. (2016). Inhibition of mTOR induces a paused pluripotent state. *Nature* 540,  
453 119-123.
- 454 Cargnello, M., and Roux, P.P. (2011). Activation and function of the MAPKs and their substrates, the  
455 MAPK-activated protein kinases. *Microbiol Mol Biol Rev* 75, 50-83.
- 456 Casas-Terradellas, E., Tato, I., Bartrons, R., Ventura, F., and Rosa, J.L. (2008). ERK and p38 pathways  
457 regulate amino acid signalling. *Biochim Biophys Acta* 1783, 2241-2254.
- 458 Chazaud, C., and Yamanaka, Y. (2016). Lineage specification in the mouse preimplantation embryo.  
459 *Development* 143, 1063-1074.
- 460 Chazaud, C., Yamanaka, Y., Pawson, T., and Rossant, J. (2006). Early lineage segregation between  
461 epiblast and primitive endoderm in mouse blastocysts through the Grb2-MAPK pathway. *Dev Cell*  
462 10, 615-624.
- 463 Corcelle, E., Djerbi, N., Mari, M., Nebout, M., Fiorini, C., Fenichel, P., Hofman, P., Poujeol, P., and Mograbi,  
464 B. (2007). Control of the autophagy maturation step by the MAPK ERK and p38: lessons from  
465 environmental carcinogens. *Autophagy* 3, 57-59.
- 466 Cuadrado, A., and Nebreda, A.R. (2010). Mechanisms and functions of p38 MAPK signalling. *Biochem J*  
467 429, 403-417.
- 468 Cully, M., Genevet, A., Warne, P., Treins, C., Liu, T., Bastien, J., Baum, B., Tapon, N., Leever, S.J., and  
469 Downward, J. (2010). A role for p38 stress-activated protein kinase in regulation of cell growth via  
470 TORC1. *Mol Cell Biol* 30, 481-495.
- 471 Desideri, E., Vegliante, R., Cardaci, S., Nepravishta, R., Paci, M., and Ciriolo, M.R. (2014).  
472 MAPK14/p38alpha-dependent modulation of glucose metabolism affects ROS levels and  
473 autophagy during starvation. *Autophagy* 10, 1652-1665.
- 474 Fleming, T.P., Watkins, A.J., Sun, C., Velazquez, M.A., Smyth, N.R., and Eckert, J.J. (2015). Do little  
475 embryos make big decisions? How maternal dietary protein restriction can permanently change an  
476 embryo's potential, affecting adult health. *Reprod Fertil Dev* 27, 684-692.
- 477 Fleming, T.P., Watkins, A.J., Velazquez, M.A., Mathers, J.C., Prentice, A.M., Stephenson, J., Barker, M.,  
478 Saffery, R., Yajnik, C.S., Eckert, J.J., Hanson, M.A., Forrester, T., Gluckman, P.D., and Godfrey,  
479 K.M. (2018). Origins of lifetime health around the time of conception: causes and consequences.  
480 *Lancet* 391, 1842-1852.
- 481 Frankenberg, S., Gerbe, F., Bessonard, S., Belville, C., Pouchin, P., Bardot, O., and Chazaud, C. (2011).  
482 Primitive endoderm differentiates via a three-step mechanism involving Nanog and RTK signaling.  
483 *Dev Cell* 21, 1005-1013.
- 484 Frum, T., and Ralston, A. (2015). Cell signaling and transcription factors regulating cell fate during  
485 formation of the mouse blastocyst. *Trends Genet* 31, 402-410.
- 486 Gutierrez-Uzquiza, A., Arechederra, M., Bragado, P., Aguirre-Ghiso, J.A., and Porras, A. (2012). p38alpha  
487 mediates cell survival in response to oxidative stress via induction of antioxidant genes: effect on  
488 the p70S6K pathway. *J Biol Chem* 287, 2632-2642.
- 489 Harding, H.P., Zhang, Y., Zeng, H., Novoa, I., Lu, P.D., Calfon, M., Sadri, N., Yun, C., Popko, B., Paules,  
490 R., Stojdl, D.F., Bell, J.C., Hettmann, T., Leiden, J.M., and Ron, D. (2003). An integrated stress  
491 response regulates amino acid metabolism and resistance to oxidative stress. *Mol Cell* 11, 619-  
492 633.
- 493 Harvey, A.J. (2019). Mitochondria in early development: linking the microenvironment, metabolism and  
494 the epigenome. *Reproduction* 157, R159-R179.
- 495 Henson, S.M., Lanna, A., Riddell, N.E., Franzese, O., Macaulay, R., Griffiths, S.J., Puleston, D.J., Watson,  
496 A.S., Simon, A.K., Tooze, S.A., and Akbar, A.N. (2014). p38 signaling inhibits mTORC1-  
497 independent autophagy in senescent human CD8(+) T cells. *J Clin Invest* 124, 4004-4016.
- 498 Hornbeck, P.V., Kornhauser, J.M., Latham, V., Murray, B., Nandhikonda, V., Nord, A., Skrzypek, E.,  
499 Wheeler, T., Zhang, B., and Gnad, F. (2019). 15 years of PhosphoSitePlus(R): integrating post-  
500 translationally modified sites, disease variants and isoforms. *Nucleic Acids Res* 47, D433-D441.
- 501 Jackson, J.R., Bolognese, B., Hillebrand, L., Kassis, S., Adams, J., Griswold, D.E., and Winkler, J.D. (1998).  
502 Pharmacological effects of SB 22025, a selective inhibitor of P38 mitogen-activated protein



- 503 kinase, in angiogenesis and chronic inflammatory disease models. *J Pharmacol Exp Ther* 284,  
504 687-692.
- 505 Kang, M., Piliszek, A., Artus, J., and Hadjantonakis, A.K. (2013). FGF4 is required for lineage restriction  
506 and salt-and-pepper distribution of primitive endoderm factors but not their initial expression in the  
507 mouse. *Development* 140, 267-279.
- 508 Kuo, C.T., Morrissey, E.E., Anandappa, R., Sigrist, K., Lu, M.M., Parmacek, M.S., Soudais, C., and Leiden,  
509 J.M. (1997). GATA4 transcription factor is required for ventral morphogenesis and heart tube  
510 formation. *Genes Dev* 11, 1048-1060.
- 511 Kwong, W.Y., Miller, D.J., Ursell, E., Wild, A.E., Wilkins, A.P., Osmond, C., Anthony, F.W., and Fleming,  
512 T.P. (2006). Imprinted gene expression in the rat embryo-fetal axis is altered in response to  
513 periconceptional maternal low protein diet. *Reproduction* 132, 265-277.
- 514 Kwong, W.Y., Wild, A.E., Roberts, P., Willis, A.C., and Fleming, T.P. (2000). Maternal undernutrition during  
515 the preimplantation period of rat development causes blastocyst abnormalities and programming  
516 of postnatal hypertension. *Development* 127, 4195-4202.
- 517 Leese, H.J. (2012). Metabolism of the preimplantation embryo: 40 years on. *Reproduction* 143, 417-427.
- 518 Li, Z., Chang, C.M., Wang, L., Zhang, P., and Shu, H.G. (2017). Cyclooxygenase-2 Induction by Amino  
519 Acid Deprivation Requires p38 Mitogen-Activated Protein Kinase in Human Glioma Cells. *Cancer*  
520 *Invest* 35, 237-247.
- 521 Linares, J.F., Duran, A., Reina-Campos, M., Aza-Blanc, P., Campos, A., Moscat, J., and Diaz-Meco, M.T.  
522 (2015). Amino Acid Activation of mTORC1 by a PB1-Domain-Driven Kinase Complex Cascade.  
523 *Cell Rep* 12, 1339-1352.
- 524 Madan, P., Rose, K., and Watson, A.J. (2007). Na/K-ATPase beta1 subunit expression is required for  
525 blastocyst formation and normal assembly of trophectoderm tight junction-associated proteins. *J*  
526 *Biol Chem* 282, 12127-12134.
- 527 Mihajlovic, A.I., Thamodaran, V., and Bruce, A.W. (2015). The first two cell-fate decisions of  
528 preimplantation mouse embryo development are not functionally independent. *Sci Rep* 5, 15034.
- 529 Moruno-Manchon, J.F., Perez-Jimenez, E., and Knecht, E. (2013). Glucose induces autophagy under  
530 starvation conditions by a p38 MAPK-dependent pathway. *Biochem J* 449, 497-506.
- 531 Murphy, M.P. (2009). How mitochondria produce reactive oxygen species. *Biochem J* 417, 1-13.
- 532 Niakan, K.K., Ji, H., Maehr, R., Vokes, S.A., Rodolfa, K.T., Sherwood, R.I., Yamaki, M., Dimos, J.T., Chen,  
533 A.E., Melton, D.A., McMahon, A.P., and Eggan, K. (2010). Sox17 promotes differentiation in mouse  
534 embryonic stem cells by directly regulating extraembryonic gene expression and indirectly  
535 antagonizing self-renewal. *Genes Dev* 24, 312-326.
- 536 Nichols, J., Silva, J., Roode, M., and Smith, A. (2009). Suppression of Erk signalling promotes ground  
537 state pluripotency in the mouse embryo. *Development* 136, 3215-3222.
- 538 O'brien, P.M.S.W., T.; Barker, D.J.P. (1999). *Fetal programming: Influences on development and disease*  
539 *in later life*.
- 540 Parente, R., Trifiro, E., Cuozzo, F., Valia, S., Cirone, M., and Di Renzo, L. (2013). Cyclooxygenase-2 is  
541 induced by p38 MAPK and promotes cell survival. *Oncol Rep* 29, 1999-2004.
- 542 Remy, G., Risco, A.M., Inesta-Vaquera, F.A., Gonzalez-Teran, B., Sabio, G., Davis, R.J., and Cuenda, A.  
543 (2010). Differential activation of p38MAPK isoforms by MKK6 and MKK3. *Cell Signal* 22, 660-667.
- 544 Rossant, J. (2016). Making the Mouse Blastocyst: Past, Present, and Future. *Curr Top Dev Biol* 117, 275-  
545 288.
- 546 Smith, W.L., Dewitt, D.L., and Garavito, R.M. (2000). Cyclooxygenases: structural, cellular, and molecular  
547 biology. *Annu Rev Biochem* 69, 145-182.
- 548 Sun, C., Denisenko, O., Sheth, B., Cox, A., Lucas, E.S., Smyth, N.R., and Fleming, T.P. (2015). Epigenetic  
549 regulation of histone modifications and Gata6 gene expression induced by maternal diet in mouse  
550 embryoid bodies in a model of developmental programming. *BMC Dev Biol* 15, 3.
- 551 Sun, C., Velazquez, M.A., Marfy-Smith, S., Sheth, B., Cox, A., Johnston, D.A., Smyth, N., and Fleming,  
552 T.P. (2014). Mouse early extra-embryonic lineages activate compensatory endocytosis in response  
553 to poor maternal nutrition. *Development* 141, 1140-1150.
- 554 Thamodaran, V., and Bruce, A.W. (2016). p38 (Mapk14/11) occupies a regulatory node governing entry  
555 into primitive endoderm differentiation during preimplantation mouse embryo development. *Open*  
556 *Biol* 6.
- 557 Trempolec, N., Dave-Coll, N., and Nebreda, A.R. (2013). SnapShot: p38 MAPK substrates. *Cell* 152, 924-  
558 924 e921.
- 559 Vucetic, M., Cormerais, Y., Parks, S.K., and Pouyssegur, J. (2017). The Central Role of Amino Acids in  
560 Cancer Redox Homeostasis: Vulnerability Points of the Cancer Redox Code. *Front Oncol* 7, 319.
- 561 Webber, J.L. (2010). Regulation of autophagy by p38alpha MAPK. *Autophagy* 6, 292-293.

- 562 Webber, J.L., and Tooze, S.A. (2010). Coordinated regulation of autophagy by p38alpha MAPK through  
563 mAtg9 and p38IP. *EMBO J* 29, 27-40.
- 564 Wu, X.N., Wang, X.K., Wu, S.Q., Lu, J., Zheng, M., Wang, Y.H., Zhou, H., Zhang, H., and Han, J. (2011).  
565 Phosphorylation of Raptor by p38beta participates in arsenite-induced mammalian target of  
566 rapamycin complex 1 (mTORC1) activation. *J Biol Chem* 286, 31501-31511.
- 567 Yamanaka, Y., Lanner, F., and Rossant, J. (2010). FGF signal-dependent segregation of primitive  
568 endoderm and epiblast in the mouse blastocyst. *Development* 137, 715-724.
- 569

570 **Figure legends**

571

572 **Figure 1 (colour). Effect of p38-MAPK inhibition on mouse blastocyst morphology and ICM cell fate**  
573 **derivation in culture conditions ± exogenous amino acid supplementation. a.** Experimental design: Embryos  
574 were collected at E1.5 (2-cell stage) and *in vitro* cultured to E3.5 in media without (KSOM) or with amino acid  
575 supplementation (KSOM+AA) and transferred to respective control (DMSO) or p38-MAPK inhibitory conditions  
576 (SB220025) until E4.5. Embryos were then fixed, immuno-stained and imaged as described in materials and  
577 methods. **b to c'.** Bright-field micrographs of mouse blastocysts at E4.5; all treatments were carried out from E3.5  
578 to E4.5 *i.e.* 24 hours. Panels, from left to right, represent KSOM + DMSO (b), KSOM + p38-MAPK inhibition (c),  
579 KSOM+AA + DMSO (b') and KSOM+AA + p38-MAPK inhibition (c'). Black arrowheads notify presence,  
580 absence and relative volumes of the blastocyst cavities. In KSOM + p38-MAPK inhibition (c), blastocoel cavities  
581 are markedly smaller and/or collapsed, whereas mostly intact cavities are observed in all other conditions. Scale bar  
582 = 40µm. **d to g'.** Z-stack projection confocal images of embryos at E4.5 under the conditions and treatments as  
583 depicted above/ panel (a); stained for, from top to bottom, nucleus/ DNA (DAPI), epiblast (NANOG), primitive  
584 endoderm (GATA4) and total inner cell mass (NANOG and GATA4 merged) under, KSOM + DMSO (d), KSOM  
585 + p38-MAPK inhibition, with no GATA4 positive cells (66% of analysed embryos) (e) and with one or more  
586 GATA4 positive cells (34% of analysed embryos) (e'), KSOM+AA + DMSO (f) and KSOM+AA + p38-MAPK  
587 inhibition with one or more GATA4 positive cells (65% of analysed embryos) (g) and with no GATA4 positive  
588 cells (35% of analysed embryos) (g') culture conditions. All images in one vertical panel are of the same embryo at  
589 the same magnification. Scale bar = 20µm.

590 **Figure 2 (colour). Effect of p38-MAPK inhibition on blastocyst cell numbers, based on DAPI, NANOG and**  
591 **GATA4 staining and confocal microscopy, in culture conditions ± exogenous amino acid supplementation.**  
592 Culture conditions in relation to amino acid supplementation status and presence of DMSO or p38-MAPK inhibitor  
593 (SB220025), from E3.5-E4.5 (as shown Fig. 1) are also shown at the bottom of the individual charts; from left to  
594 right; KSOM + DMSO (n = 67), KSOM + p38i (n = 77), KSOM+AA + DMSO (n = 71) and KSOM+AA + p38i (n  
595 = 76). **a.** Quantification of total cell number based on counting DAPI stained blastomere nuclei. **b.** Quantification  
596 of outer cell number based on subtracting NANOG and/or GATA4 positive inner cells from the DAPI stained total  
597 cell number (plus position within the embryo). **c.** Quantification of inner cell number based on NANOG and/or  
598 GATA4 stained inner cells (plus position within the embryo). **d.** Quantification of epiblast (EPI) cell number based  
599 on NANOG alone stained inner cells. **e.** Quantification of primitive endoderm (PrE) cell number based on GATA4  
600 alone stained inner cells. **f.** Contribution of GATA4 stained primitive endoderm cells as a ratio of the total inner  
601 cells (NANOG and/or GATA4 stained cells). **g.** Explanatory scheme of method employed to calculate PrE:ICM  
602 ratio values depicted in panel (g). Statistical test employed: Mann-Whitney test (GraphPad Prism 8). Unless  
603 otherwise stated, within the graphs as a distinct P value (if statistically insignificant), the significance intervals are  
604 denoted: P value < 0.0001 (\*\*\*\*), 0.0001 to 0.001 (\*\*\*), 0.001 to 0.01 (\*\*), and 0.01 to 0.05 (\*). Data relating to  
605 each individual embryo assayed are detailed in supplementary tables S1.

606 **Figure 3 (colour). Amino acid starvation coupled with p38-MAPK inhibition induces increased blastocyst**  
607 **ROS levels whereas amino acid starvation alone is sufficient to induce increased phosphorylation/activation**

608 **of p38-MAPK and transcription of genes with enzymatic anti-oxidant properties. a.** Experimental design  
609 detailing culture conditions for embryos and sampling time points used to visualise and quantify blastocyst ROS  
610 levels. **b.** Projected confocal z-stack images of blastocyst embryos stained with CellROX Green at E3.75 and 4.25  
611 and were respectively imaged live or after fixation. A spectral rainbow palette is used to denote signal intensity  
612 levels (blue representing lowest to white denoting highest signal intensity); scale bar = 20µm. **c.** Quantification of  
613 the average per embryo incidence of ROX-positive foci (maxima) for the E4.25 assayed and fixed embryo groups  
614 cultured in KSOM plus DMSO and SB220025; as described in panels a) and b). The statistical test employed was  
615 an unpaired, two-tailed students t-test. The stated significance intervals are depicted as: P value < 0.0001 (\*\*\*\*),  
616 0.0001 to 0.001 (\*\*\*), 0.001 to 0.01 (\*\*) and 0.01 to 0.05 (\*). The graphs represent dot plots of total sample size  
617 together with stated experimental group means and the standard deviations (error bars). **d.** Experimental design  
618 detailing culture conditions for embryos and sampling time points used in western blotting based assay of activated  
619 and phosphorylated p38-MAPK protein expression in blastocyst embryos cultured in KSOM ±AA. **e.**  
620 Representative western blot of phosphorylated p38-MAPK and GAPDH (as control) blastocyst protein levels, after  
621 culture in KSOM and KSOM+AA, at E3.5 and E3.75. Note, uneven sample loading (GAPDH) and hence need for  
622 normalised quantitation (panel f). **f.** Relative signal intensity quantification data of the GAPDH normalised levels  
623 of phosphorylated p38-MAPK protein expression (judged by western blot) in blastocysts (at E3.5 and E3.75) after  
624 culture in KSOM and KSOM+AA (from two independent biological replicates). **g.** Experimental design detailing  
625 culture conditions for embryos used in Q-RTPCR based quantification of enzymatic anti-oxidant gene mRNA  
626 expression in blastocysts (at E4.0) cultured in KSOM±AA treated with DMSO or p38-MAPK inhibitor  
627 (SB220025). **h.** Quantification of the relative transcript expression levels of *Cat*, *Sod1* and *Sod2*, internally  
628 normalised to *H2afz* levels, across the four conditions. The statistical test employed were Welch's ANOVA tests  
629 followed by Dunnett's T3 multiple comparisons test (GraphPad Prism 8). Unless otherwise stated within individual  
630 charts as a specific P value (if statistically insignificant), the stated significance intervals are as follows: P value <  
631 0.0001 (\*\*\*\*), 0.0001 to 0.001 (\*\*\*), 0.001 to 0.01 (\*\*) and 0.01 to 0.05 (\*); error bars denote standard deviation  
632 and mean *H2afz* normalised expression levels are numerically stated.

633 **Figure 4 (colour). Effect of anti-oxidant (NAC) treatment on p38-MAPK inhibited blastocyst cell numbers,**  
634 **based on DAPI, NANOG and GATA4 staining and confocal microscopy, in culture conditions ± exogenous**  
635 **amino acid supplementation. a.** Experimental design detailing culture conditions of embryos recovered at the 2-  
636 cell (E1.5) stage, in regard to culture media amino acid supplementation status and the possible combined regimes  
637 of NAC plus DMSO or p38-MAPK inhibitor (SB220025) treatment from E3.5-E4.5. KSOM group (b-g), left to  
638 right: DMSO (n = 67), p38-MAPK inhibition (n = 77), DMSO + 1mM NAC (n = 28), p38-MAPK inhibition +  
639 1mM NAC (n = 38), DMSO + 10mM NAC (n = 17) and p38-MAPK inhibition + 10mM NAC (n = 18).  
640 KSOM+AA group (b'-g'), left to right: DMSO (n = 71), p38-MAPK inhibition (n = 76), DMSO + 1mM NAC (n =  
641 20), p38-MAPK inhibition + 1mM NAC (n = 22), DMSO + 10mM NAC (n = 19) and p38-MAPK inhibition +  
642 10mM NAC (n = 20). An explanatory matrix of the composition of each experimental condition is present beneath  
643 the relevant charts, at the base of the whole figure. **b & b'.** Quantification of total cell number based on counting  
644 DAPI stained nuclei of the blastomeres. **c & c'.** Quantification of outer cell number based on subtracting NANOG  
645 and/or GATA4 positive inner cells from the DAPI stained total cell number (plus position within the embryo). **d &**  
646 **d'.** Quantification of inner cell number based on NANOG and/or GATA4 stained inner cells number (plus position

647 within the embryo). **e & e'**. Quantification of epiblast cell number based on NANOG alone stained inner cells. **f &**  
648 **f'**. Quantification of primitive endoderm cell number based on GATA4 alone stained inner cells. **g & g'**.  
649 Quantification of the contribution of GATA4 stained primitive endoderm cells as a ratio of the total inner cells  
650 (NANOG and/or GATA4 stained cells). Statistical test employed: Mann-Whitney test (GraphPad Prism 8). Unless  
651 otherwise stated, within the graphs as a distinct P value (if statistically insignificant), the significance intervals are  
652 as follows: P value < 0.0001 (\*\*\*\*), 0.0001 to 0.001 (\*\*\*), 0.001 to 0.01 (\*\*), and 0.01 to 0.05 (\*). Note, data  
653 relating to DMSO and p38-MAPK inhibition conditions in KSOM and KSOM+AA media are reproduced from  
654 Fig. 2 to aid comparison with NAC treated groups. Data relating to each individual embryo assayed are detailed in  
655 supplementary tables S2. A Welch's ANOVA statistical analysis of the data presented in this figure is presented in  
656 supplementary table 5.

657 **Figure 5 (colour). Effect of anti-oxidant (NAC) treatment on uncommitted ICM cells in p38-MAPK inhibited**  
658 **blastocysts, based on DAPI, NANOG and GATA6 staining and confocal microscopy, in culture conditions ±**  
659 **exogenous amino acid supplementation. a.** Experimental design detailing culture conditions of embryos  
660 recovered at the 2-cell (E1.5) stage, in regard to culture media amino acid supplementation status and the possible  
661 combined regimes of NAC plus DMSO or p38-MAPK inhibitor (SB220025) treatment from E3.5-E4.5. **b to d'.**  
662 Single confocal microscopy z-sections of representative E4.5 embryos, cultured in KSOM (plus indicated  
663 combined regimes of DMSO/SB220025 and NAC from E3.5-E4.5) stained for, from top to bottom, nucleus/ DNA  
664 (DAPI), epiblast (NANOG), primitive endoderm (GATA6) and uncommitted cells (NANOG and GATA6 co-  
665 staining – see pseudo-coloured merged image). Yellow arrowheads highlight ICM cells co-expressing both markers  
666 (*i.e.* uncommitted cells); panels (c) and (c') show examples of embryos in which addition of 1mM NAC was able to  
667 either rescue, or not rescue, ICM cells from the p38-MAPK inhibition induced uncommitted cell fate, respectively.  
668 All images in one vertical panel are of the same embryo at same magnification. Scale bar = 20µm. **e & e'**.  
669 Contribution of GATA6 and NANOG co-stained (*i.e.* uncommitted) cells, shown as a ratio of the averaged total of  
670 inner cells (NANOG and/or GATA6 inner stained cells), in embryos cultured in KSOM (e) or KSOM+AA (e')  
671 under indicated (see explanatory matrix, as in Fig. 4) combined regimes of DMSO/SB220025 and NAC treatment  
672 from E3.5-E4.5; KSOM (e), left to right: DMSO (n = 12), p38-MAPK inhibition (n = 12), DMSO + 1mM NAC (n  
673 = 11), p38-MAPK inhibition + 1mM NAC (n = 10), DMSO + 10mM NAC (n = 9) and p38-MAPK inhibition +  
674 10mM NAC (n = 10); KSOM+AA (e'), left to right: DMSO (n = 37), p38-MAPK inhibition (n = 38), DMSO +  
675 1mM NAC (n = 20), p38-MAPK inhibition + 1mM NAC (n = 22), DMSO + 10mM NAC (n = 16) and p38-MAPK  
676 inhibition + 10mM NAC (n = 11). Statistical test employed: Mann-Whitney test (GraphPad Prism 8). Unless  
677 otherwise stated, within the graphs as a distinct P value (if statistically insignificant), the significance intervals are:  
678 P value < 0.0001 (\*\*\*\*), 0.0001 to 0.001 (\*\*\*), 0.001 to 0.01 (\*\*), and 0.01 to 0.05 (\*). Data relating to each  
679 individual embryo assayed are detailed in supplementary table S3. A Welch's ANOVA statistical analysis of the  
680 data presented in this figure is presented in supplementary table 5. **f.** Model: irrespective of exogenous AA media  
681 supplementation (*i.e.* KSOM±AA), early (E3.5) stage blastocysts are able to appropriately specify and segregate  
682 ICM cell lineages (red EPI & blue PrE) by the late blastocyst (E4.5) stage. However, inhibition of p38-MAPK  
683 reveals derivation of ICM lineages from initially uncommitted progenitors (shown in grey) is differentially  
684 impaired in a manner dependent on exogenous AA media supplementation. Whereas in the presence of exogenous  
685 AA (KSOM+AA) it is only the PrE (and not EPI) that fails to specify, a complete absence of provided AA

686 (KSOM) is associated with the majority of ICM cells (*i.e.* EPI & PrE progenitors) being retained in the  
687 uncommitted state by the late blastocyst (E4.5) stage, with reduced cell number and smaller cavities. Further  
688 supplementation of the anti-oxidant NAC is able to partially rescue the more severe phenotype associated with p38-  
689 MAPK inhibition in a subset of embryos cultured in KSOM media (to a point resembling p38-MAPK inhibition in  
690 KSOM+AA media; *i.e.* specified EPI, unspecified PrE), whereas NAC addition had no effect on the milder p38-  
691 MPAK inhibition phenotype observed in embryos cultured in KSOM+AA. Collectively, such data indicate a  
692 requirement for p38-MAPK to homeostatically buffer, AA depletion induced oxidative stress (caused by increased  
693 ROS levels), to allow germane blastocyst development and conditions conducive to EPI specification; however PrE  
694 specification and ultimate differentiation is governed by an, as yet unknown, but independent p38-MAPK mediated  
695 mechanism [downstream of FGF-signalling, as previously described (Thamodaran and Bruce, 2016)].  
696

**Fig 1**

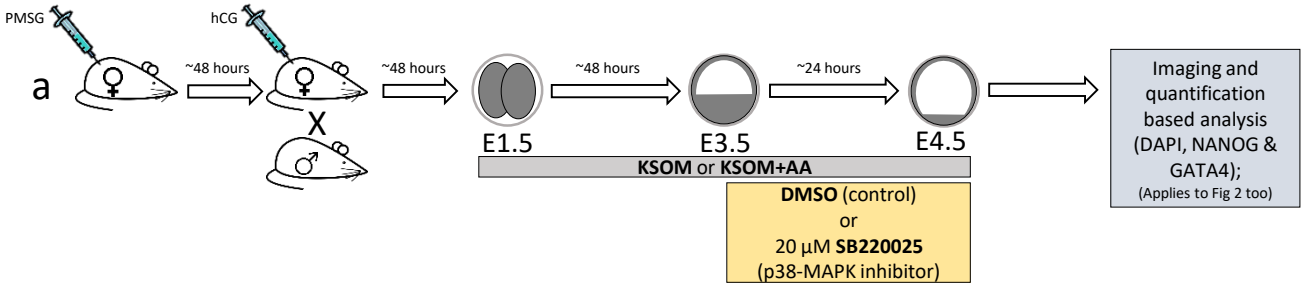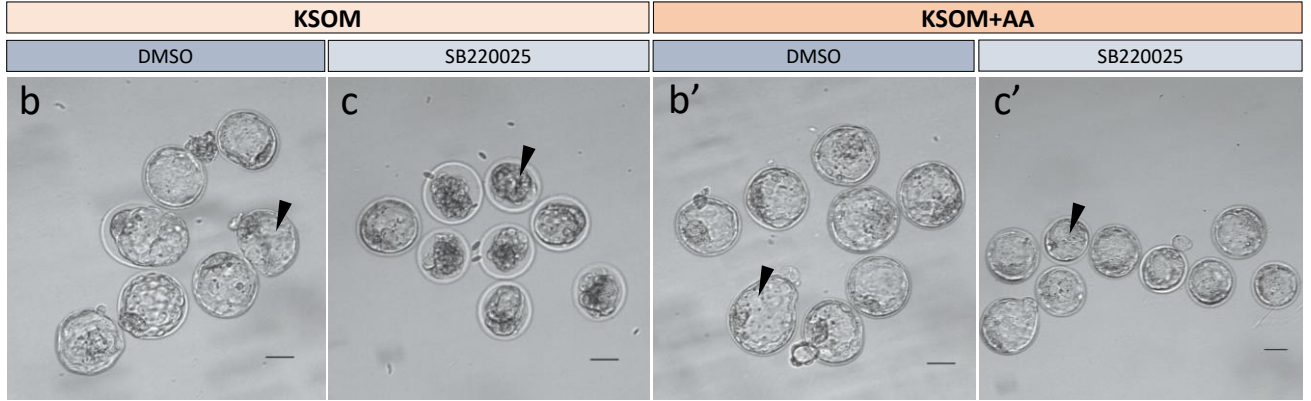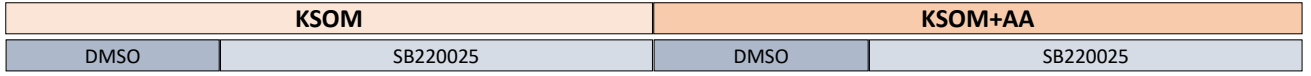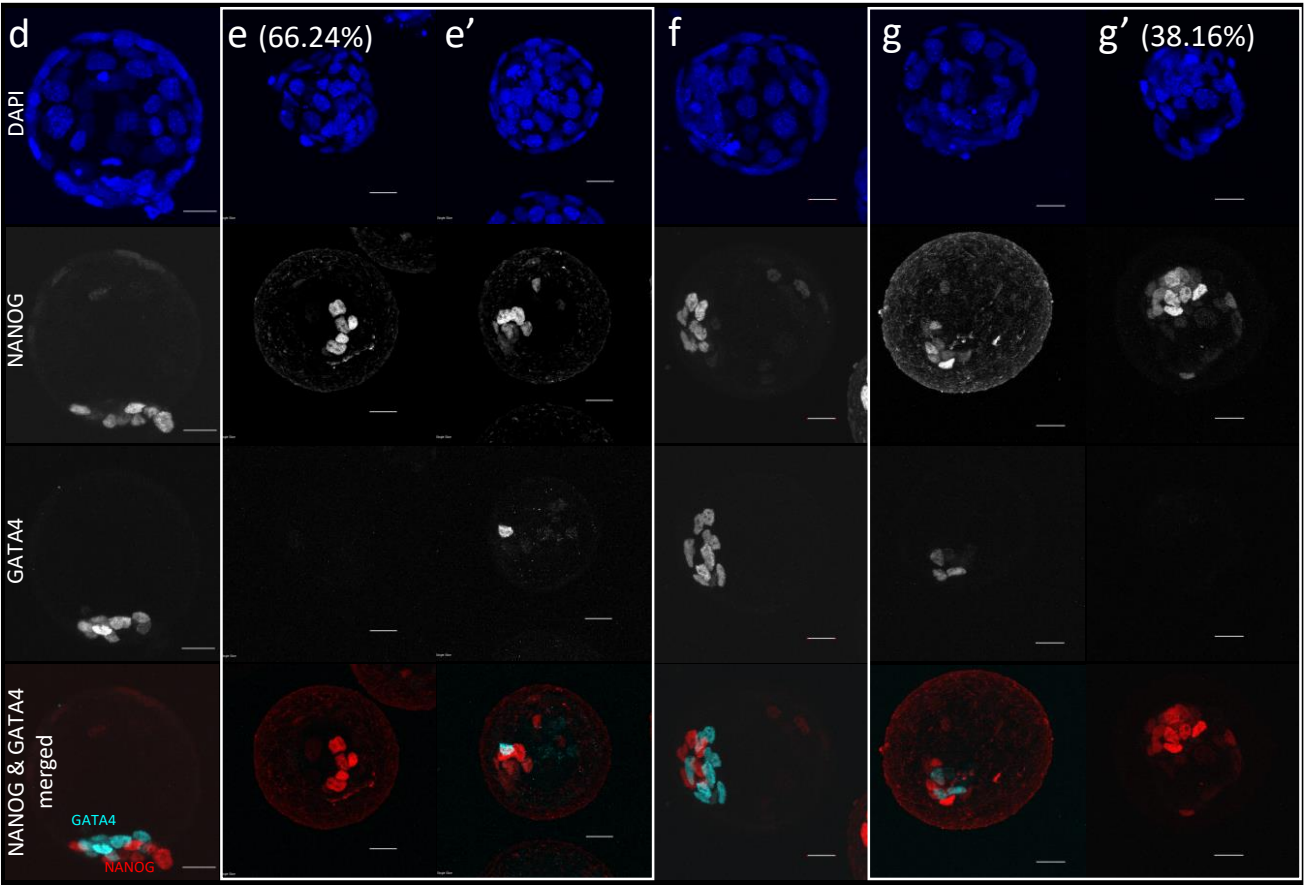

Fig 2

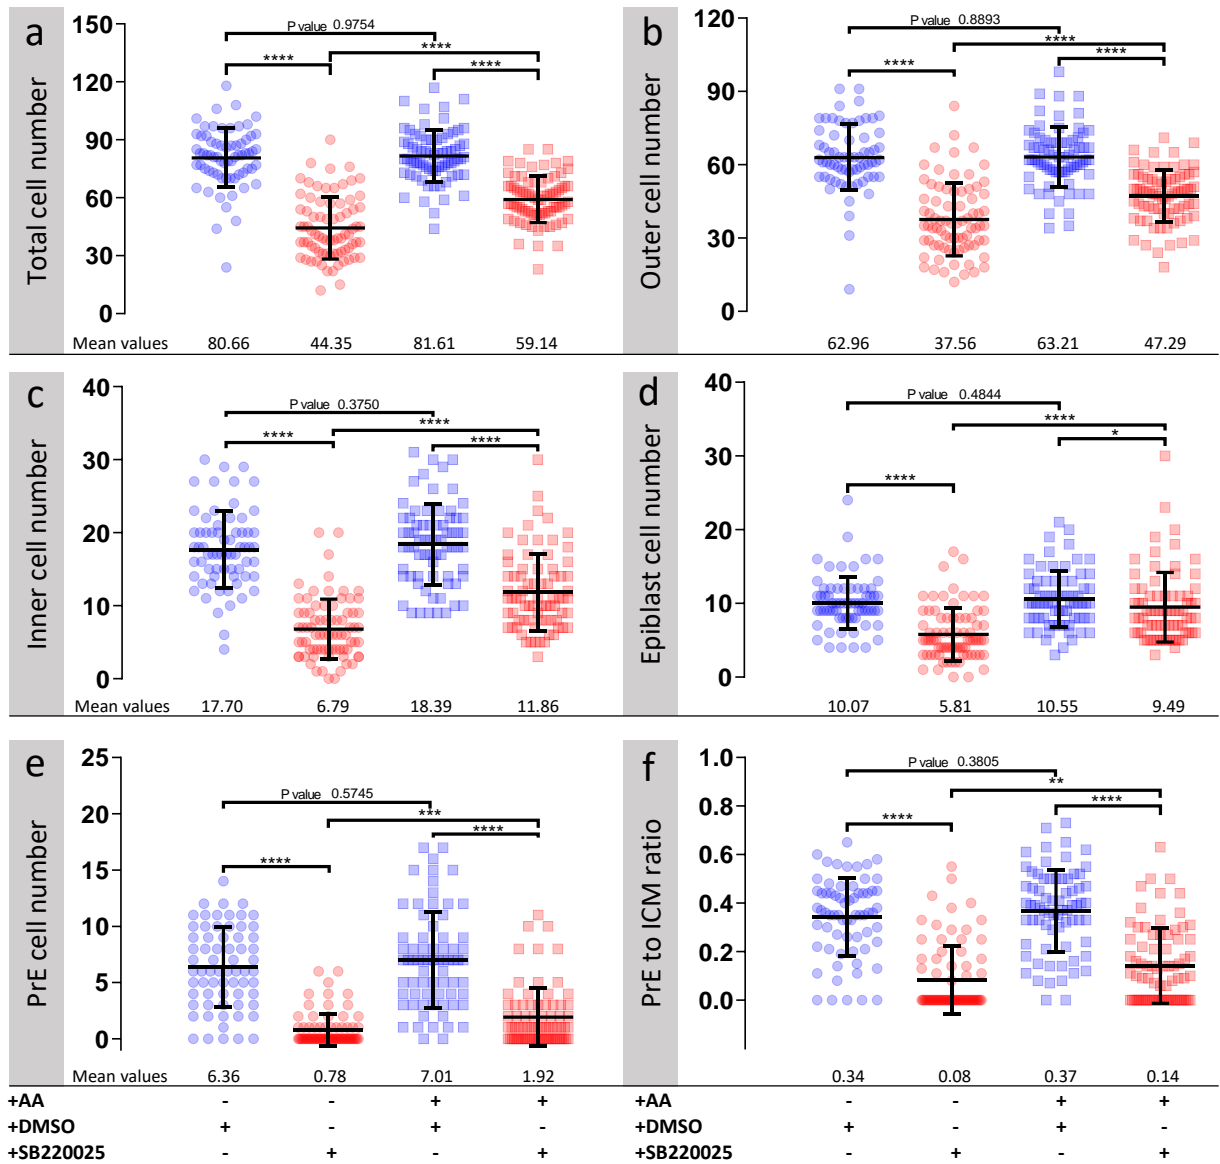

**g**

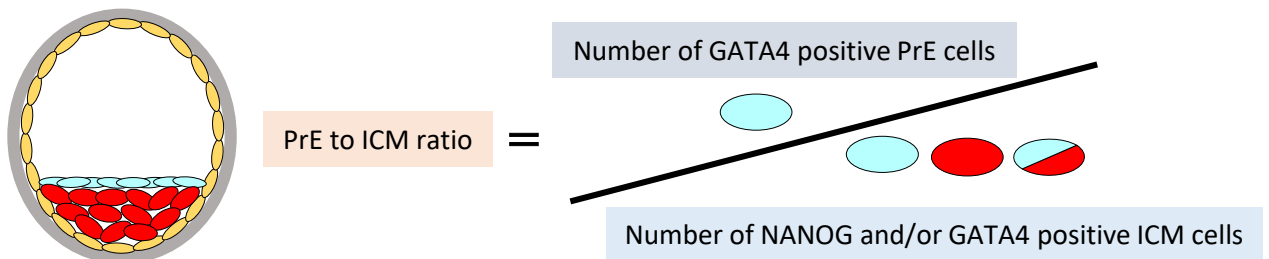



**Fig 3**

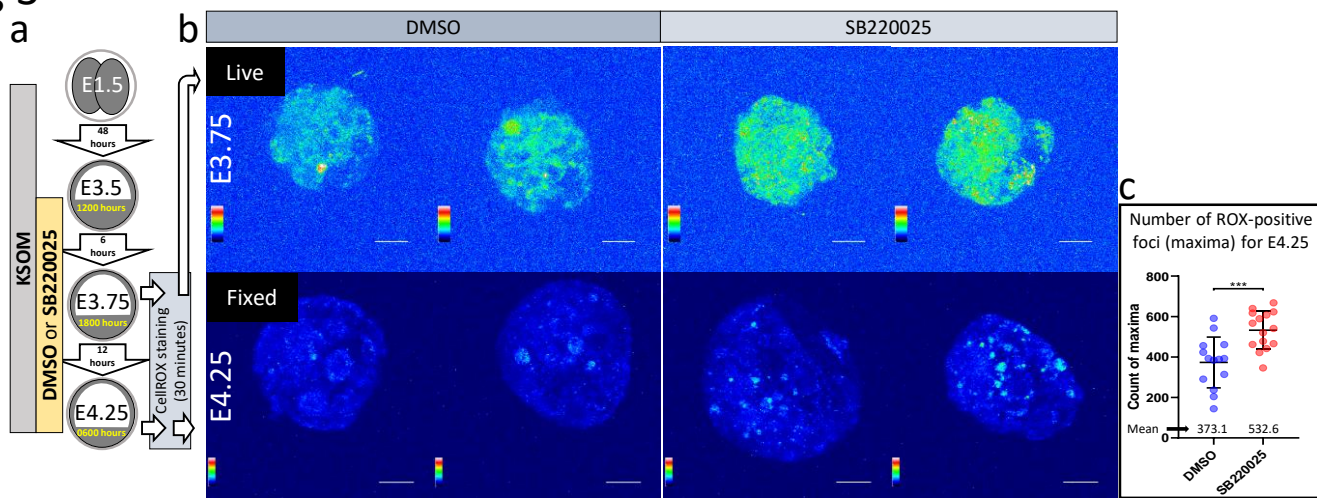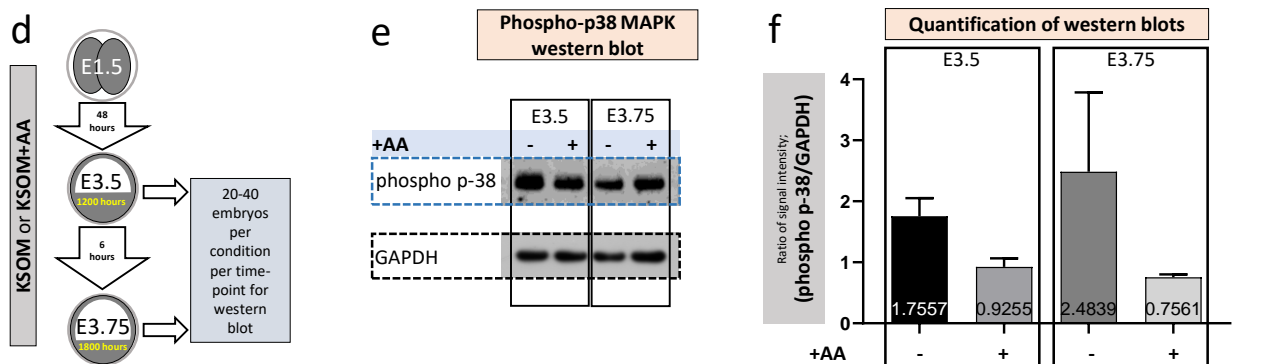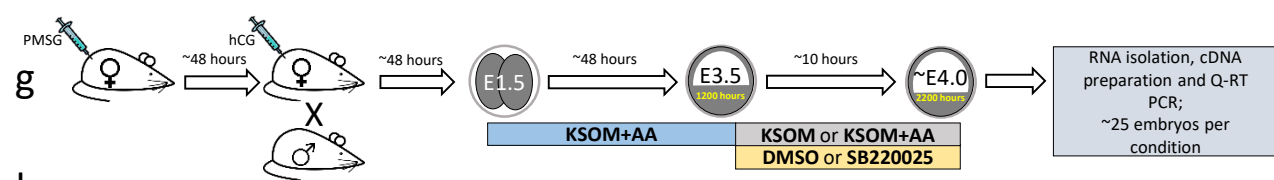

Fig 4 i

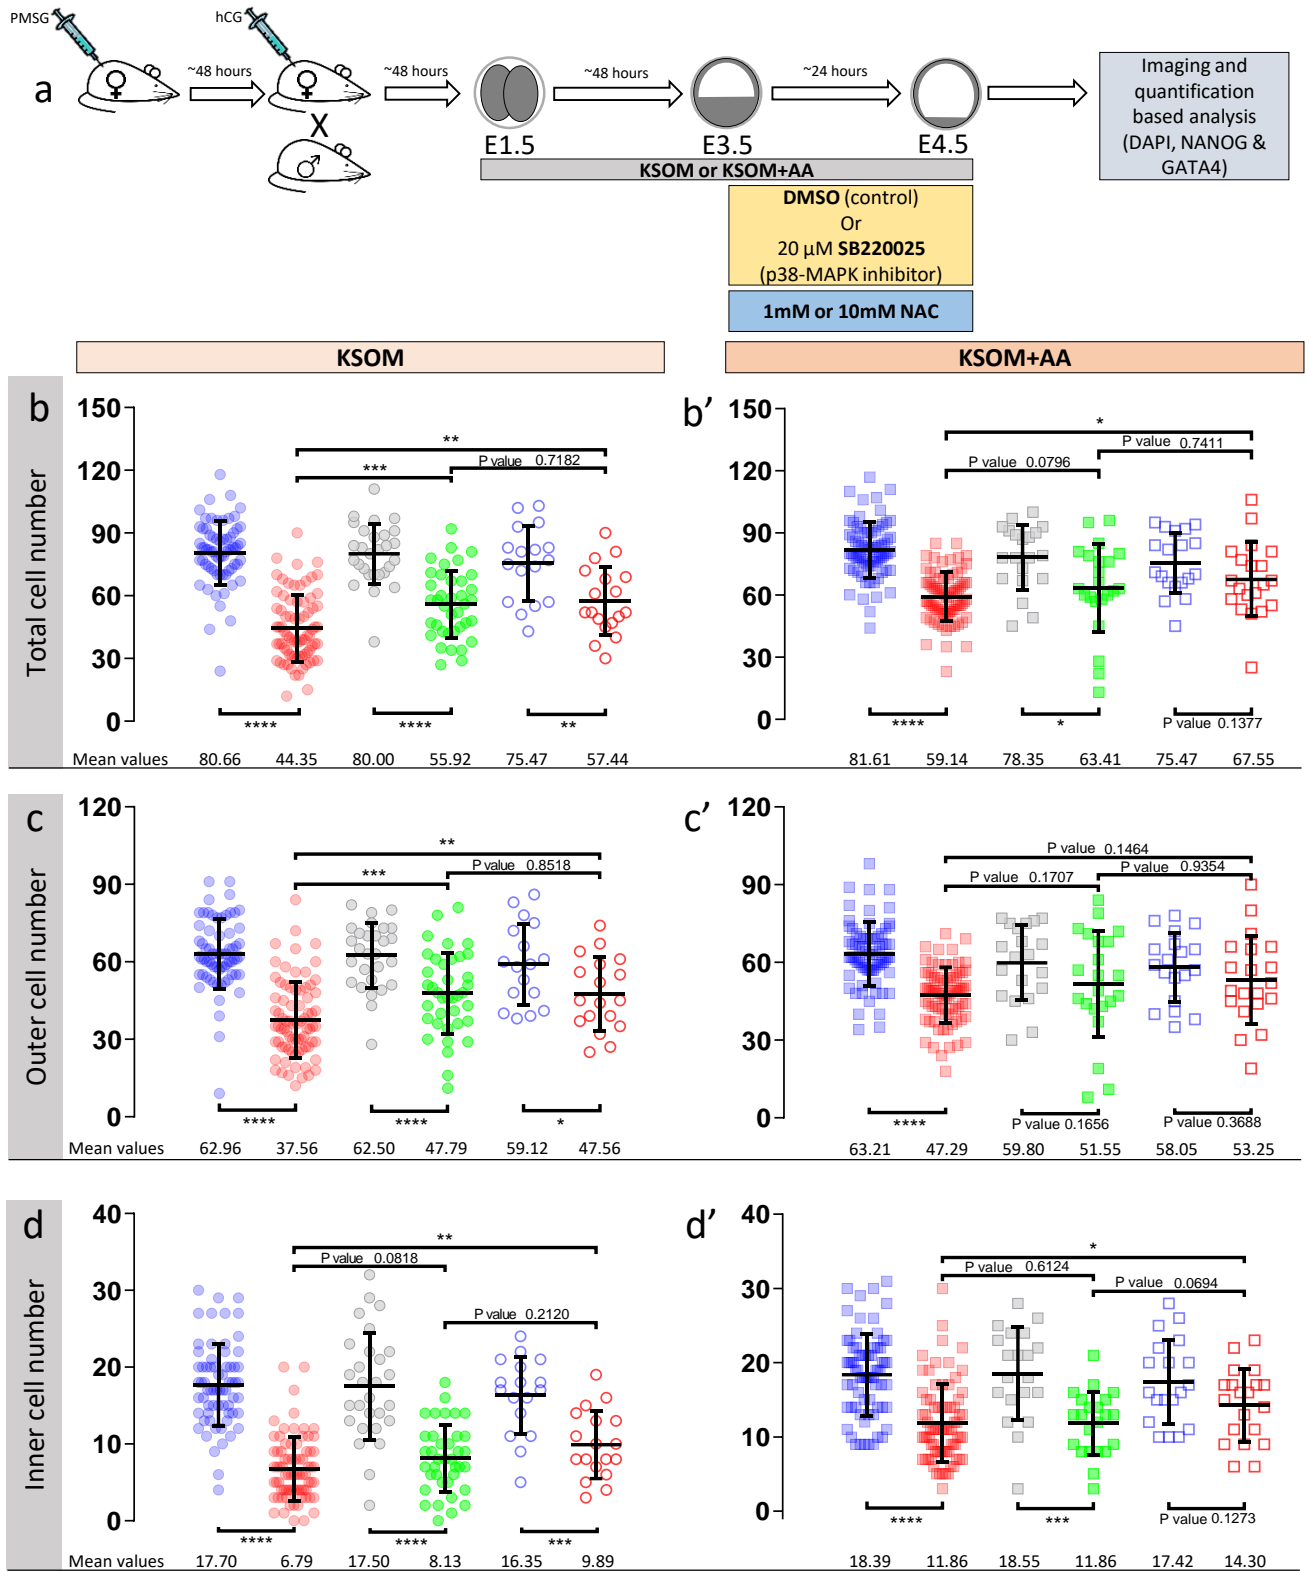

Fig 4 ii

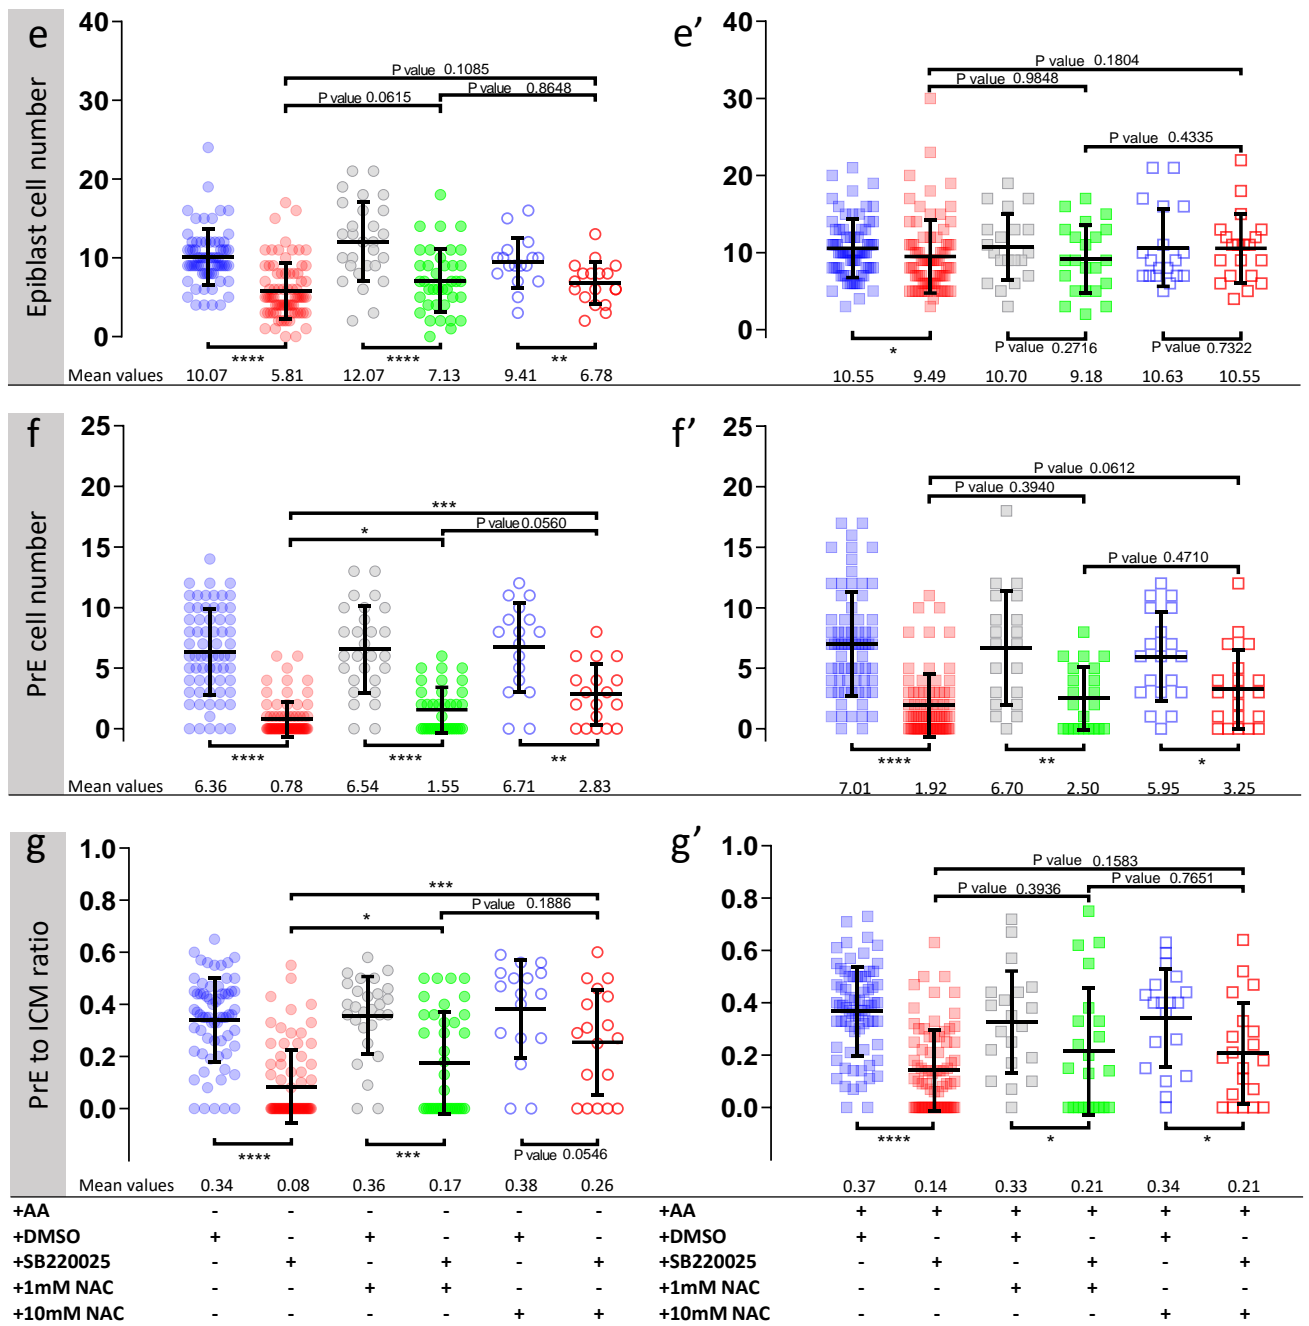

Fig 5

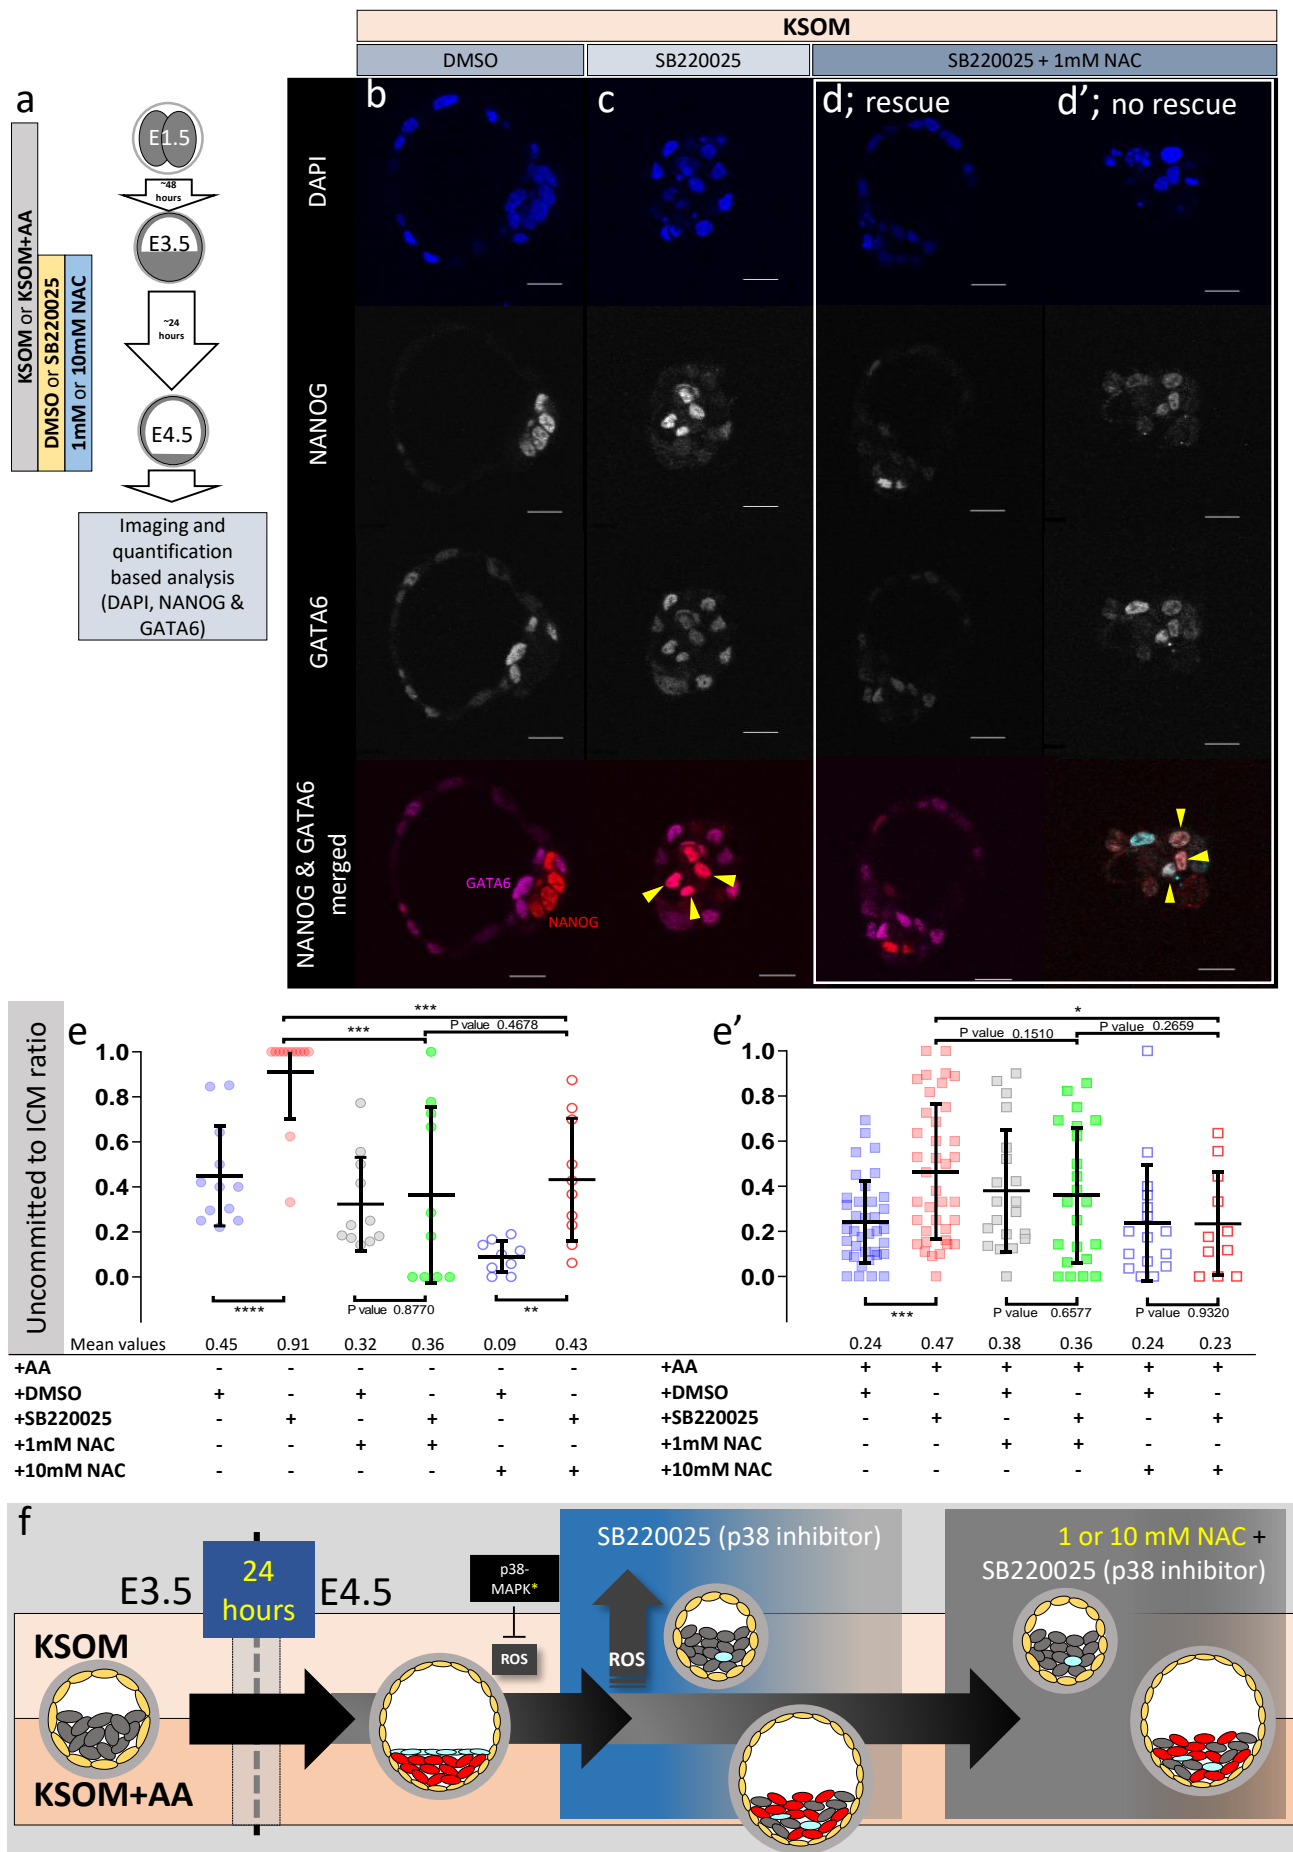

Source: https://www.biorxiv.org/content/10.1101/807305v1.full.pdf
